# Supplementary material for: Disability discrimination and well-being in the United Kingdom: a prospective cohort study
Source: PubMed Central journal article supplement (PMC7069317; doi:10.1136/bmjopen-2019-035714), 2020-03-12
Supplement: bmjopen-2019-035714.draft_revisions.pdf [file bmjopen-2019-035714.draft_revisions.pdf]

# BMJ Open

BMJ Open is committed to open peer review. As part of this commitment we make the peer review history of every article we publish publicly available.

When an article is published we post the peer reviewers' comments and the authors' responses online. We also post the versions of the paper that were used during peer review. These are the versions that the peer review comments apply to.

The versions of the paper that follow are the versions that were submitted during the peer review process. They are not the versions of record or the final published versions. They should not be cited or distributed as the published version of this manuscript.

BMJ Open is an open access journal and the full, final, typeset and author-corrected version of record of the manuscript is available on our site with no access controls, subscription charges or pay-per-view fees (<http://bmjopen.bmj.com>).

If you have any questions on BMJ Open's open peer review process please email [info.bmjopen@bmj.com](mailto:info.bmjopen@bmj.com)

# BMJ Open

## Disability discrimination and mental health: A prospective analysis

|                               |                                                                                                                                                                                                                                                                                                                                                                                                      |
|-------------------------------|------------------------------------------------------------------------------------------------------------------------------------------------------------------------------------------------------------------------------------------------------------------------------------------------------------------------------------------------------------------------------------------------------|
| Journal:                      | <i>BMJ Open</i>                                                                                                                                                                                                                                                                                                                                                                                      |
| Manuscript ID                 | bmjopen-2019-035714                                                                                                                                                                                                                                                                                                                                                                                  |
| Article Type:                 | Original research                                                                                                                                                                                                                                                                                                                                                                                    |
| Date Submitted by the Author: | 13-Nov-2019                                                                                                                                                                                                                                                                                                                                                                                          |
| Complete List of Authors:     | Hackett, Ruth; University College London, Behavioural Science and Health; King's College London, Health Psychology Section<br>Lang, Raymond; University College London, Leonard Cheshire Research Centre, Epidemiology and Public Health<br>Stephoe, Andrew; University College London, Behavioural Science and Health<br>Jackson, Sarah ; University College London, Behavioural Science and Health |
| Keywords:                     | EPIDEMIOLOGY, MENTAL HEALTH, PUBLIC HEALTH                                                                                                                                                                                                                                                                                                                                                           |
|                               |                                                                                                                                                                                                                                                                                                                                                                                                      |

SCHOLARONE™  
Manuscripts

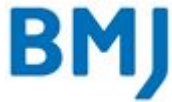

I, the Submitting Author has the right to grant and does grant on behalf of all authors of the Work (as defined in the below author licence), an exclusive licence and/or a non-exclusive licence for contributions from authors who are: i) UK Crown employees; ii) where BMJ has agreed a CC-BY licence shall apply, and/or iii) in accordance with the terms applicable for US Federal Government officers or employees acting as part of their official duties; on a worldwide, perpetual, irrevocable, royalty-free basis to BMJ Publishing Group Ltd ("BMJ") its licensees and where the relevant Journal is co-owned by BMJ to the co-owners of the Journal, to publish the Work in this journal and any other BMJ products and to exploit all rights, as set out in our [licence](#).

The Submitting Author accepts and understands that any supply made under these terms is made by BMJ to the Submitting Author unless you are acting as an employee on behalf of your employer or a postgraduate student of an affiliated institution which is paying any applicable article publishing charge ("APC") for Open Access articles. Where the Submitting Author wishes to make the Work available on an Open Access basis (and intends to pay the relevant APC), the terms of reuse of such Open Access shall be governed by a Creative Commons licence – details of these licences and which [Creative Commons](#) licence will apply to this Work are set out in our licence referred to above.

Other than as permitted in any relevant BMJ Author's Self Archiving Policies, I confirm this Work has not been accepted for publication elsewhere, is not being considered for publication elsewhere and does not duplicate material already published. I confirm all authors consent to publication of this Work and authorise the granting of this licence.

## Disability discrimination and mental health: A prospective analysis

Ruth A. Hackett<sup>1,2\*</sup>, Andrew Steptoe<sup>1</sup>, Raymond P. Lang<sup>3</sup>, and Sarah E. Jackson<sup>1</sup>

<sup>1</sup> Department of Behavioural Science and Health, University College London, London, UK

<sup>2</sup> Health Psychology Section, Department of Psychology, Institute of Psychiatry, Psychology and Neuroscience, Guy's Hospital, King's College London, London, UK

<sup>3</sup> Leonard Cheshire Research Centre, Department of Epidemiology and Public Health, University College London, London, UK

**\*Corresponding author:** Ruth A. Hackett, PhD. Department of Behavioural Science and Health, University College London and Health Psychology Section, Department of Psychology, Institute of Psychiatry, Psychology and Neuroscience, Guy's Hospital, King's College London, London, UK

Email: [ruth.hackett.09@ucl.ac.uk](mailto:ruth.hackett.09@ucl.ac.uk) ORCID: <https://orcid.org/0000-0002-5428-2950>

**Co-author emails:** [a.steptoe@ucl.ac.uk](mailto:a.steptoe@ucl.ac.uk) [r.lang@ucl.ac.uk](mailto:r.lang@ucl.ac.uk) [s.e.jackson@ucl.ac.uk](mailto:s.e.jackson@ucl.ac.uk)

**Word count:** 3981

**Number of tables:** 5

1  
2  
3 **26 Abstract**  
4

5 **27 Objectives:** Disability discrimination is linked with poorer mental health cross-sectionally.  
6

7  
8 **28** The aim of this study was to explore prospective associations between disability discrimination  
9  
10 and mental wellbeing.  
11

12 **30 Design:** Prospective cohort study  
13

14 **31 Setting:** The United Kingdom Household Longitudinal Study  
15

16  
17 **32 Participants:** Data were from 871 individuals with a self-reported physical, cognitive or  
18  
19 sensory disability.  
20

21 **34 Primary outcome measures:** Depression was assessed in 2009/10. Psychological distress,  
22  
23 mental functioning, life satisfaction and self-rated health were assessed in 2009/10 and  
24  
25 2013/14.  
26  
27

28 **37 Results:** Data were analysed using linear and logistic regression with adjustment for age, sex,  
29  
30 household income, education, ethnicity and impairment category. Perceived disability  
31  
32 discrimination was reported by 117 (13.4%) participants. Cross-sectionally, discrimination was  
33  
34 associated with depression (Odds ratio (OR) = 5.40, 95% Confidence Interval (CI) 3.25; 8.97)  
35  
36 associated with depression (Odds ratio (OR) = 5.40, 95% Confidence Interval (CI) 3.25; 8.97)  
37  
38 fair/poor self-rated health (OR=2.05; 95% CI 1.19; 3.51), greater psychological distress ( $B =$   
39  
40 3.28, 95% CI 2.41; 4.14), poorer mental functioning ( $B = -7.35$ ; 95% CI -9.70; -5.02) and life  
41  
42 satisfaction ( $B = -1.27$ , 95% CI -1.66; -0.87). Prospectively, discrimination was associated with  
43  
44 increased psychological distress ( $B = 2.88$ , 95% CI 1.39; 4.36) and poorer mental functioning  
45  
46 ( $B = -5.12$ ; 95% CI -8.91; -1.34), adjusting for baseline scores.  
47  
48

49 **46 Conclusions:** Perceived disability-related discrimination is linked with poorer mental  
50  
51 wellbeing. These findings underscore the need for interventions to combat disability  
52  
53 discrimination.  
54

55  
56 **49 Key words:** disability, discrimination; prejudice; stigma; mental health; wellbeing  
57  
58  
59  
60

## 51 Article Summary

- 52 • The use of the prospective United Kingdom Household Longitudinal Study allowed  
53 use to examine changes in mental wellbeing over a 4 year period.
- 54 • The disability discrimination measure took into account several kinds of  
55 discriminatory behaviour and included multiple settings where perceived disability  
56 discrimination could be encountered.
- 57 • Our findings are based on perceptions of disability discrimination rather than  
58 objective encounters with disability discrimination.
- 59 • Disability discrimination was only assessed at one point in time, meaning our measure  
60 does not necessarily reflect pervasive discrimination.

61  
62  
63  
64  
65 **Funding:** This work was supported by the Economic and Social Research Council  
66 (<https://esrc.ukri.org/>), grant number ES/R005990/1. The funders had no role in study design,  
67 data collection and analysis, decision to publish, or preparation of the manuscript.

68 **Competing interests:** The authors declare that they have no conflict of interest.

69 **Data sharing:** The UKHLS datasets analysed during the current study are freely available in  
70 the UK Data Service repository <https://ukdataservice.ac.uk/>

## 76 **Introduction**

77 "Disability" is an umbrella term for long-term impairments, activity limitations and  
78 participation restrictions, experienced by an individual with a health condition in interaction  
79 with their environment[1–3]. In the UK, the prevalence of disability is rising, with 21% of the  
80 population reporting a disability in 2017-2018, an increase from 18% in 2007-2008[4]. The  
81 majority of disabled people report experiencing difficulties in everyday life. For example,  
82 disabled people in Britain have lower educational attainment, are less likely to be employed  
83 and are more likely to live in poverty than non-disabled adults[5], with knock on effects  
84 regarding access to health and other services[6].

85         These practical difficulties may be aggravated by discrimination. Disability  
86 discrimination has been defined as unwanted, exploitative or abusive conduct against disabled  
87 people which violates their dignity and security or creates an intimidating or offensive  
88 environment[7]. Although disability is a protected characteristic under equality legislation[1],  
89 disability discrimination is perceived to be common. In a 2015 population survey of 27,718  
90 adults from 26 European countries, 50% of participants reported disability discrimination to be  
91 widespread, a 4% increase from 2012 data[8].

92         Disability discrimination can happen in a variety of settings including on the street, in  
93 the workplace and in public venues such as shops or pubs[9]. Recent British data suggests that  
94 disabled people are more likely than non-disabled people to report feeling unsafe when walking  
95 alone and to worry about physical attack and theft [10,11]. Disability is the second most  
96 common motivator for hate crime incidents, after race in England and Wales[12]. In the  
97 workplace, several studies suggest that a greater proportion of disabled than non-disabled  
98 individuals report experiences of discrimination [7,13].

99         A growing body of research has investigated discrimination as a determinant of mental  
100 wellbeing[14–16]. Meta-analyses have linked perceived discrimination with depression and

1  
2  
3 101 psychological distress and with poorer life satisfaction and self-rated health[14–16]. However,  
4  
5 102 disability discrimination was not assessed in two of these meta-analyses and the majority of  
6  
7 103 previous working has focused on racism [14,15]. In the most recent pooled analysis of  
8  
9 104 328 studies, physical illness discrimination and disability discrimination were assessed as a  
10  
11 105 combined category[16], with associations between discrimination and greater psychological  
12  
13 106 distress and lower self-esteem detected.  
14  
15

16  
17 107 Several cross-sectional studies have assessed perceived disability discrimination alone  
18  
19 108 in relation to mental wellbeing outcomes. One study of 229 individuals with an intellectual  
20  
21 109 disability in England found that self-reported stigma was associated with a greater number of  
22  
23 110 depression and anxiety symptoms[17]. Two analyses of the Australian Survey of Disability,  
24  
25 111 Ageing and Carers (n=9655 and n=6183, respectively) linked disability discrimination with  
26  
27 112 greater psychological distress[18,19]. This association was similarly observed in a Swedish  
28  
29 113 general population survey[20]. Research has also linked perceived disability discrimination  
30  
31 114 with lower life satisfaction in Canadian adolescents[21], Korean women with severe  
32  
33 115 disabilities[22] and Israeli nationals with physical disabilities[23]. Perceived disability  
34  
35 116 discrimination has been associated with poorer self-rated health cross-sectionally in three  
36  
37 117 studies[19,24,25] including a general population analysis of 52,458 individuals, from the  
38  
39 118 European Social Survey[25].  
40  
41  
42  
43

44 119 Cross-sectional correlations are difficult to interpret: perception of discrimination may  
45  
46 120 result in emotional distress, but it is also possible that emotional distress leads to alterations in  
47  
48 121 how people interpret social interactions with others. To date, only one study has assessed  
49  
50 122 prospective associations between perceived disability discrimination and mental health and  
51  
52 123 wellbeing outcomes[26]. In an analysis of older adults ( $\geq 50$  years) participating in the US-  
53  
54 124 based Health and Retirement Study (HRS), perceived disability discrimination was associated  
55  
56 125 with poorer life satisfaction, self-rated health, and greater loneliness over four-year follow-up.  
57  
58  
59  
60



1  
2  
3 126 Overall, previous research has been dominated by cross-sectional studies, precluding  
4  
5 127 the assessment of the temporal relationship between perceived disability discrimination and  
6  
7 128 mental wellbeing outcomes. No longitudinal studies have compared people with a disability  
8  
9  
10 129 who do or do not report discrimination and wellbeing outcomes. To address these limitations,  
11  
12 130 this study aimed to investigate cross-sectional and prospective associations between perceived  
13  
14 131 disability discrimination and mental wellbeing in a UK population cohort.  
15  
16  
17 132

## 19 133 **Methods**

### 21 134 **Study population**

23  
24 135 This study uses data from Understanding Society: The UK Household Longitudinal Study  
25  
26 136 (UKHLS)[27]. Data collection began in 2009/10 (wave 1) with follow-ups annually. This study  
27  
28 137 uses data from waves 1 (2009/10) and 5 (2013/14). The UKHLS comprises of a representative  
29  
30 138 sample of the UK population, in addition to an ethnic minority boost sample[28,29]. Our data  
31  
32 139 come from the 'extra 5 minutes sample' of over 8,000 participants who had an additional 5  
33  
34 140 minutes of questions on issues pertinent to ethnicity research including discrimination. This  
35  
36 141 sample comprises of mostly ethnic minorities ( $n = 6722$ ) along with a comparison group of  
37  
38 142 white participants ( $n = 1428$ )[28]. We restricted our sample to those who responded to the  
39  
40 143 disability discrimination questions ( $n = 4788$ ) with a self-reported disability ( $n = 871$ ). At wave  
41  
42 144 5 there was loss to follow-up ( $n=431$ ), leaving a follow-up sample size of 440 participants. Our  
43  
44 145 definition of disability did not include mental health-related impairments. Ethical approval for  
45  
46 146 UKHLS was obtained from the University of Essex Ethics Committee. All participants  
47  
48 147 provided fully informed consent.  
49  
50  
51  
52  
53  
54 148

### 56 149 **Perceived disability discrimination**

57  
58  
59  
60

1  
2  
3 150 To assess discrimination, participants were asked whether in the past 12 months they (a) felt  
4  
5 151 unsafe, (b) avoided going to or being in, (c) had been insulted, called names, threatened or  
6  
7 152 shouted at, or (d) had been physically attacked, in seven different settings: 1) At  
8  
9 153 school/college/work, 2) On public transport, 3) At or around bus or train stations, 4) In a taxi,  
10  
11 154 5) Public buildings such as shopping centres or pubs, 6) Outside on the street, in parks or other  
12  
13 155 public places, or 7) At home. If they answered yes, a follow-up question asked them to choose  
14  
15 156 a reason from a list of categories including disability, sex and ethnicity among others. It was  
16  
17 157 possible to choose multiple settings and attributions for the perceived discrimination. Those  
18  
19 158 who attributed any experience of discrimination to disability are treated as cases of perceived  
20  
21 159 disability discrimination.  
22  
23  
24  
25  
26  
27  
28

### 29 161 **Outcome variables**

30  
31 162 Self-reported doctor-diagnosed clinical depression was measured at wave 1 (2009/10) with  
32  
33 163 responses coded as yes/no. Depression was not analysed longitudinally due to a lack of incident  
34  
35 164 cases. All other outcomes were assessed at waves 1 (2009/10) and 5 (2013/14). Psychological  
36  
37 165 distress was measured using the General Health Questionnaire (GHQ)-12[30], which involved  
38  
39 166 ratings of 12 statements including whether the individual had "*Been able to enjoy your normal*  
40  
41 167 *day to day activities*" or whether they "*Felt constantly under strain*" with response options of  
42  
43 168 0="no" and 1="yes". Total scores range from 0 (least distressed) to 12 (most distressed). The  
44  
45 169 12-item short-form health survey (SF-12) mental component summary score was used to  
46  
47 170 measure limitations caused by emotional, mental health and social functioning issues[31].  
48  
49 171 Items included ratings of feelings experienced over the past 4 weeks such as "*Have you felt*  
50  
51 172 *downhearted or blue?*" or "*Accomplished less than you would like*". Overall scores were  
52  
53 173 derived using standard methods ranging from 0 (low functioning) to 100 (high functioning)  
54  
55 174 [32]. Life satisfaction was assessed using one item asking participants how satisfied they were  
56  
57  
58  
59  
60

1  
2  
3 175 with their “life overall”, with scores ranging from 1 (completely dissatisfied) to 7 (completely  
4  
5 176 satisfied). Self-rated health was assessed using a single item: “*Would you say your health*  
6  
7 177 *is...poor/fair/good/very good/excellent?*” In keeping with previous investigations [33,34] self-  
8  
9 178 rated health was dichotomised with 0 being “good/very good/excellent” and 1 meaning  
10  
11  
12 179 “poor/fair”.

13  
14  
15 180

### 17 181 **Covariates**

18  
19 182 A number of covariates (assessed at wave 1) that are likely relevant to perceived disability  
20  
21 183 discrimination and mental health were included in our analyses. Age in years was entered as a  
22  
23 184 continuous variable. Sex was included as a binary variable (male/female). Equivalised monthly  
24  
25 185 household income was calculated by dividing total household net income by the modified  
26  
27 186 Organization for Economic Cooperation and Development (OECD) equivalence scale to adjust  
28  
29 187 for the effects of household size and composition[35]. Education was included as a 3-level  
30  
31 188 variable: 1 “university degree”, 2 “high school qualification” and 3 “no qualification”. As our  
32  
33 189 sample was ethnically diverse, we included ethnicity as a 4-level variable with 1 being “white”  
34  
35 190 including those of white British, white Irish and any other white background, 2 being “south  
36  
37 191 Asian” including Indian, Pakistani and Bangladeshi individuals, 3 being “black” including  
38  
39 192 black African and black Caribbean participants and 4 being “other” including individuals from  
40  
41  
42 193 Chinese and mixed backgrounds. There were 4 categories of impairment measured in the study:  
43  
44 194 “physical” disability which included difficulties with manual dexterity and mobility;  
45  
46 195 “cognitive” disability including problems with memory or the ability to concentrate, learn and  
47  
48 196 understand; “sensory” disability including hearing (apart from using a standard hearing aid)  
49  
50 197 and sight impairments (apart from wearing standard glasses) and “other” which encompassed  
51  
52 198 reports of unspecified disability not captured in the other categories.  
53  
54  
55  
56  
57  
58  
59  
60

## 200 **Statistical analyses**

201 We compared the characteristics of those who did and those who did not report disability  
202 discrimination at wave 1 using Chi-squared tests for categorical variables and independent  
203 samples t-tests for continuous variables. Associations between perceived disability  
204 discrimination and the various wellbeing measures were assessed using linear regression for  
205 continuous outcomes and logistic regression for categorical outcomes. For cross-sectional  
206 analyses, depression, psychological distress (GHQ-12), SF-12 mental component score, life  
207 satisfaction and self-rated health at wave 1 (2009/10) were the outcome variables. For  
208 prospective analyses, psychological distress (GHQ-12), SF-12 mental component score, life  
209 satisfaction and self-rated health at wave 5 (2013/14) were the outcomes. Age, sex, household  
210 income, education, ethnicity and disability type at wave 1 were controlled for in all analyses.  
211 Baseline (wave 1) scores/status on the relevant wellbeing variable was included as an additional  
212 covariate in prospective analyses. We tested for interactions between perceived disability  
213 discrimination and age, sex, income, education, ethnicity or impairment type on wellbeing at  
214 wave 5. No significant effects were detected. Thus, interaction terms were not included in our  
215 models. Results from linear regression analyses are presented as unstandardized B and 95%  
216 confidence intervals (95% CI). Results from logistic regression analyses are presented as odds  
217 ratios (ORs) and 95% CI. All analyses were conducted using SPSS v.24.

218

## 219 **Sensitivity analyses**

220 We carried out two sensitivity analyses. In our first, we assessed whether those who were lost  
221 to follow-up ( $n = 431$ ) differed from those who provided data at both waves ( $n = 440$ ). We  
222 tested whether this impacted the results by conducting the cross-sectional analyses (wave 1)  
223 including only those who provided follow-up data at wave 5. In our second sensitivity analysis,  
224 we assessed whether a certain type of discriminatory behaviour contributing to the measure of

225 perceived disability discrimination was driving the results. We tested this cross-sectionally and  
226 prospectively removing each type of discriminatory behaviour in turn.

227

## 228 **Results**

229 A total of 871 participants were included in the study and of these 117 (13.4%) reported  
230 perceived disability discrimination. Of the categories of discrimination assessed, the most  
231 commonly reported was feeling unsafe (86.1%; 95% CI 79.48-92.74), followed by avoiding  
232 somewhere (72.8%; 95% CI 64.08-81.55), being insulted (23.5%; 95% CI 14.33-32.73) and  
233 being physically attacked (2.8%; 95% CI 0.04-5.98). The most common settings in which  
234 disability discrimination was reported were on the street (77.8%; 95% CI 70.13-85.42), in  
235 public buildings such as shops or pubs (59.8%; 95% CI 50.81-68.84), on public transport  
236 (51.3%; 95% CI 42.09-60.47) and at or around bus or train stations (40.2%; 95% CI 31.16-  
237 49.19). A quarter of participants reported experiencing disability discrimination at home (25%;  
238 95% CI 17.61-33.67). Perceived disability discrimination was less frequently reported in  
239 school or workplace settings (12.8%; 95% CI 6.67-18.97) or in taxis (12%; 95% CI 6-17.93).  
240 The prevalence of the various types of perceived disability discrimination and the settings in  
241 which the discrimination occurred for different types of disability can be found in  
242 Supplementary Table 1. There were no statistically significant differences between people with  
243 different types of disability in discrimination type or discrimination setting.

244 The baseline characteristics of the sample are displayed in Table 1. The group who  
245 reported disability discrimination were younger on average ( $48.29 \pm 14.89$  years) than those  
246 who did not report discrimination ( $53.42 \pm 16.56$  years). They were more likely to be white  
247 (27.4% vs. 20.3%) and to be better educated than those who did not report discrimination, with  
248 a greater proportion holding university degrees (28.2% vs 22.7%). Physical disability was most

249 common in those who did not perceive discrimination (46.6%), whereas other unspecified  
250 disabilities (65%) were most frequently reported by those who perceived discrimination.

251

### 252 **Cross-sectional associations between perceived disability discrimination and wellbeing**

253 Our findings suggest that individuals who perceived disability discrimination were  
254 significantly more likely to report a diagnosis of clinical depression (OR=5.40; 95% CI 3.25;  
255 8.97,  $p < 0.001$ ) and were more likely to rate their health as fair/poor (OR=2.05; 95% CI 1.19;  
256 3.51,  $p = 0.009$ ) than those who did not perceive disability discrimination, independent of  
257 covariates (first panel Table 2). Those who reported discrimination also had significantly  
258 higher levels of psychological distress ( $B = 3.28$ , 95% CI 2.41; 4.14,  $p < 0.001$ ), poorer mental  
259 functioning on the SF-12 ( $B = -7.35$ ; 95% CI -9.70; -5.02,  $p < 0.001$ ) and lower life satisfaction  
260 ( $B = -1.27$ , 95% CI -1.66; -0.87,  $p < 0.001$ ), than those who did not report discrimination

261

### 262 **Prospective associations between perceived disability discrimination and wellbeing**

263 In prospective analyses (second panel Table 2), those who reported perceived disability  
264 discrimination had higher levels of psychological distress 4 years later than those who did not  
265 report discrimination, independent of covariates and baseline psychological distress ( $B = 2.88$ ,  
266 95% CI 1.39; 4.36,  $p < 0.001$ ). We detected a prospective association between perceived  
267 disability discrimination and poorer SF-12 mental functioning ( $B = -5.12$ ; 95% CI -8.91; -1.34,  
268  $p = 0.008$ ). Those who reported disability discrimination had slightly lower life satisfaction  
269 (means= 4.14 vs 4.67) and a greater proportion rated their health as fair/poor (67.3% vs 62.1%)  
270 than those who did not report discrimination at follow-up. However, these differences did not  
271 reach statistical significance.

272

### 273 **Sensitivity analyses**

1  
2  
3 274 In the first sensitivity analysis (Table 3), cross-sectional findings for those who provided  
4  
5 275 complete data at wave 5 were similar to the full-sample at wave 1. The demographic  
6  
7 276 characteristics of those lost to follow-up were similar to those of complete cases (Table 4).  
8  
9  
10 277 Only education differed significantly between the groups, with those who provided complete  
11  
12 278 data at wave 5 more likely to hold a degree (27.0%) than those lost to follow-up (19.7%).

13  
14 279 In the second sensitivity analysis, removing each of the discriminatory behaviours from  
15  
16 280 the measure of discrimination in turn did not alter the cross-sectional results (Table 5).  
17  
18 281 Prospectively, the association between perceived disability discrimination and increased  
19  
20 282 psychological distress remained the same regardless of the type of discriminatory behaviour  
21  
22 283 removed from the measure. For SF-12 mental functioning, the association was fairly robust to  
23  
24 284 the type of discriminatory behaviour, but was slightly attenuated when “feeling unsafe” was  
25  
26 285 removed from the discrimination variable ( $p = 0.058$ ). Again, no significant prospective  
27  
28 286 associations were detected for life satisfaction and self-rated health.  
29  
30  
31  
32

33 287

## 34 35 288 **Discussion**

36  
37 289 In a sample of UK-based participants with self-reported disability, perceived discrimination  
38  
39 290 was associated with higher prevalence of depression, greater psychological distress, and poorer  
40  
41 291 mental functioning, life satisfaction and self-rated health. Prospectively, disability  
42  
43 292 discrimination was associated with increased psychological distress and worse mental  
44  
45 293 functioning four-years later. Our results were robust to adjustment for a range of covariates and  
46  
47 294 were not driven by any specific kind of discriminatory behaviour. No significant prospective  
48  
49 295 relationships with life satisfaction and self-rated health were observed.  
50  
51  
52

53 296 Previous literature has been dominated by cross-sectional studies. To our knowledge,  
54  
55 297 only one previous study has investigated the prospective association between disability  
56  
57 298 discrimination and wellbeing outcomes. In this analysis of US adults from the HRS cohort,  
58  
59  
60

1  
2  
3 299 perceived disability discrimination was associated with poorer life satisfaction and self-rated  
4  
5 300 health over four year follow-up [26]. In the current study we observed poorer mental  
6  
7 301 functioning and greater psychological distress four years later in those who reported disability  
8  
9 302 discrimination, taking into account baseline scores on these variables. We failed to detect a  
10  
11 303 significant association between perceived discrimination and life satisfaction or self-rated  
12  
13 304 health at follow-up. Although on average, those who perceived disability discrimination in our  
14  
15 305 sample had poorer life satisfaction and were more likely to rate their health as fair/poor at  
16  
17 306 follow-up than those who did not perceive discrimination, these differences did not reach  
18  
19 307 statistical significance. One reason for the divergence in findings between our study and the  
20  
21 308 HRS analysis [26] may be study design. We limited our analyses to those with a confirmed  
22  
23 309 disability, whereas in the HRS study associations between wellbeing and disability  
24  
25 310 discrimination were assessed across the entire sample. Our analysis offers more precision in  
26  
27 311 the assessment of the relationship between disability discrimination and wellbeing outcomes,  
28  
29 312 by directly comparing people with disability who did and did not perceive discrimination.  
30  
31 313 Another possibility for these null findings may be that significant associations between  
32  
33 314 discrimination and life satisfaction and self-rated health do not become apparent until older  
34  
35 315 adulthood, perhaps allowing for repeated exposures to disability discrimination. However, this  
36  
37 316 assertion remains to be tested. Another potential explanation is that the impact of ongoing  
38  
39 317 disability discrimination on life satisfaction and self-rated health in our sample had already  
40  
41 318 become apparent at the time of the baseline survey, limiting the scope for further decline.  
42  
43  
44  
45  
46  
47  
48

49 319 Our study adds to the cross-sectional literature linking perceived disability  
50  
51 320 discrimination and poorer mental health and wellbeing outcomes by demonstrating  
52  
53 321 associations in a community sample of disabled people living in the UK. Our results extend the  
54  
55 322 findings of an earlier study linking stigma and depression in those with intellectual  
56  
57 323 disability[17], by establishing this relationship in a sample with a broader range of disability.  
58  
59  
60



1  
2  
3 324 In keeping with previous studies, we observed greater psychological distress[18–20] and  
4  
5 325 poorer life satisfaction[21–23,26] in those who reported disability discrimination. Our study  
6  
7 326 adds to this existing evidence by demonstrating this link in a UK-based sample for the first  
8  
9  
10 327 time. Similar to earlier work from Australian, European and North American  
11  
12 328 samples[19,24,26,36], we observed a relationship between perceived disability discrimination  
13  
14 329 and poorer self-rated health. Cross-sectional studies cannot determine whether perceived  
15  
16 330 disability discrimination predicts poor mental wellbeing, or whether perceptions of  
17  
18 331 discrimination are an indicator of psychological distress. Our prospective findings therefore  
19  
20 332 add to the field in establishing that perceived disability discrimination predicts psychological  
21  
22 333 distress and poorer mental functioning, net of baseline associations, so has negative  
23  
24 334 implications for future mental health.

25  
26  
27  
28 335 This is an observational study and longitudinal analyses do not necessarily imply  
29  
30 336 causality. There could be unmeasured factors responsible for the associations that emerged.  
31  
32 337 Nevertheless, with regard to the pathways linking perceived disability discrimination and  
33  
34 338 mental health and wellbeing, there are several possibilities that could explain our results. One  
35  
36 339 mechanism could be that perceptions of disability discrimination in healthcare settings serve  
37  
38 340 to impede access to health services. An analysis of HRS found that reports of frequent  
39  
40 341 discrimination in healthcare settings were predictive of new or worsened disability over four  
41  
42 342 year follow-up[37]. Quantitative[38,39] and qualitative[40] evidence suggests that those who  
43  
44 343 perceive disability discrimination are less likely to seek healthcare. However, there may be sex  
45  
46 344 differences in this association, with a Swedish study only detecting a relationship between  
47  
48 345 disability discrimination and healthcare avoidance in women[39]. However, no interaction  
49  
50 346 between sex and perceived discrimination was detected in the current study (data not shown).

51  
52  
53  
54 347 Poor health behaviours are another potential mechanism linking disability  
55  
56 348 discrimination and poorer mental wellbeing. For example, perceived disability discrimination  
57  
58  
59  
60

1  
2  
3 349 has been linked with worse sleep quality in the HRS, with psychological distress acting as a  
4  
5 350 full mediator of this association[41]. It is possible that disabled people could engage in negative  
6  
7 351 health behaviours as a means of coping with the psychological impact of discrimination. In a  
8  
9 352 study of 304 individuals with disability, perceived disability discrimination was positively  
10  
11 353 associated with illicit drug use[42]. Eating may offer a source of comfort in the face of  
12  
13 354 discrimination[43]. A US study of over 5000 individuals, observed a link between physical  
14  
15 355 disability discrimination and overeating[44].

16  
17  
18  
19 356 Another possibility is that perceived disability discrimination and mental wellbeing are  
20  
21 357 linked through disturbed stress-related biological processes. In line with the theory of allostatic  
22  
23 358 load, perceived chronic discrimination causing frequent activation of the stress response  
24  
25 359 system, could over time result in disturbances across multiple biological systems[45].  
26  
27 360 Systematic reviews and meta-analyses, which have predominately focused on racism, suggest  
28  
29 361 that discrimination is linked with heightened cardiovascular stress reactivity[14,46], while  
30  
31 362 race[46–48] and weight discrimination[49] have been linked with alterations in cortisol. To our  
32  
33 363 knowledge, no study has investigated associations between perceived disability discrimination  
34  
35 364 and changes in cardiovascular or neuroendocrine activity. In the HRS cohort, perceived  
36  
37 365 disability discrimination was linked with raised c-reactive protein levels cross-sectionally[50].  
38  
39 366 Heightened inflammation is thought to be predictive of poorer mental wellbeing[51], offering  
40  
41 367 a plausible pathway between perceived disability discrimination and later psychological  
42  
43 368 distress and poorer mental functioning seen in the present study. Further work is required to  
44  
45 369 confirm this assertion, particularly as the HRS analysis was not limited to those with a  
46  
47 370 confirmed disability.

48  
49  
50  
51 371 Our study had several strengths. The use of the UKHLS cohort allowed us to examine  
52  
53 372 changes in mental wellbeing over a 4-year period across a wide age range (17 – 96 years),  
54  
55 373 while adjusting statistically for factors that could confound associations. The discrimination  
56  
57  
58  
59  
60

1  
2  
3 374 measure took into account several kinds of discriminatory behaviour and included multiple  
4  
5 375 settings where perceived disability discrimination could be encountered.  
6  
7

8 376 However, the study was not without limitations. Our findings are based on perceptions  
9  
10 377 of disability discrimination rather than objective encounters with disability discrimination. It  
11  
12 378 is possible that perceiving oneself as a target for discrimination and objective encounters with  
13  
14 379 discrimination could have differing consequences for mental wellbeing. Indeed, earlier work  
15  
16 380 in a sample with significant health limitations, indicates that individuals with poorer mental  
17  
18 381 wellbeing may be more likely to perceive stigma[52]. Future studies assessing reciprocal  
19  
20 382 prospective associations between perceived disability discrimination and health could help to  
21  
22 383 clarify this issue. Our discrimination measure was based on self-reports of experiences during  
23  
24 384 the past 12 months and was therefore subject to recall bias. Further, this measure was not  
25  
26 385 specific to disability discrimination. The fact that participants were able to attribute multiple  
27  
28 386 reasons for their experience of discrimination, could have helped avoid priming or bias. Other  
29  
30 387 tools specifically designed to assess disability discrimination could have garnered different  
31  
32 388 results. Further work is required to understand how disability discrimination interacts with  
33  
34 389 other types of discrimination to influence wellbeing. Disability discrimination was only  
35  
36 390 assessed at one point in time, meaning our measure does not necessarily reflect pervasive  
37  
38 391 discrimination. Future research is required to determine whether perceptions of disability  
39  
40 392 discrimination are persistent or alter over time. Our study included participants with physical,  
41  
42 393 cognitive and sensory disabilities. However, for a large proportion (37%) their disability type  
43  
44 394 was unknown and classified as “other”, limiting our understanding.  
45  
46  
47  
48  
49

50  
51 395 Overall, our study adds to the literature by demonstrating prospective associations  
52  
53 396 between perceived disability discrimination and mental wellbeing outcomes. These findings  
54  
55 397 emphasise the need to reduce the prevalence of disability discrimination, with the benefit of  
56  
57 398 promoting equality as well as possible advantages for mental wellbeing too. Though complete  
58  
59  
60

1  
2  
3 399 elimination of disability discrimination is likely to be difficult, recognition of disability  
4  
5 400 discrimination as an issue is the first step in preventing its occurrence. Addressing this could  
6  
7 401 involve raising awareness through the use of campaigns. The Public Sector Equality Duty in  
8  
9 402 the UK requires public bodies to have due regard to the need to eliminate discrimination and  
10  
11 403 this awareness raising should begin early in life[7]. However, it is estimated that less than 40%  
12  
13 404 of English primary schools have a disability equality scheme in place, with race and gender  
14  
15 405 equality more often prioritised over disability equality[53]. Therefore, further effort on this  
16  
17 406 issue is required[7], particularly as disability discrimination is perceived to be more widespread  
18  
19 407 than gender discrimination in Europe[8].  
20  
21  
22  
23

24 408 As well as macro-level awareness raising, on an individual basis the negative impact of  
25  
26 409 perceived disability discrimination on mental health may be buffered through the use of social  
27  
28 410 support. In two cross-sectional studies of US adults with varied disability diagnoses, those with  
29  
30 411 more friends reported greater life satisfaction and these friendships attenuated the link between  
31  
32 412 functional impairment and poorer quality of life[54]. In an Israeli study, perceived disability  
33  
34 413 discrimination and poorer life satisfaction were only linked in those with low and moderate  
35  
36 414 levels of social support, with no association in those with greater levels of support[55]. Further  
37  
38 415 research into the mechanisms underlying disability discrimination is necessary to develop  
39  
40 416 awareness campaigns and to appropriately target individual-level interventions.  
41  
42  
43  
44  
45  
46  
47  
48  
49  
50  
51  
52  
53  
54  
55  
56  
57  
58  
59  
60

1  
2  
3 422 **Author contributions:** RAH conducted the statistical analysis and wrote the manuscript. AS  
4  
5 423 edited and reviewed the manuscript. RPL edited and reviewed the manuscript. SJ provided  
6  
7 424 scientific overview, edited and reviewed the manuscript.  
8  
9

10 425

11  
12 426 **Patient and Public Involvement**

13  
14 427 No patients or members of the public were involved in study design or conduct.  
15  
16

17 428

18  
19 429

20  
21 430

22  
23 431

24  
25 432

26  
27 433

28  
29 434

30  
31 435

32  
33 436

34  
35 437

36  
37 438

38  
39 439

40  
41 440

42  
43 441

44  
45 442

46  
47 443

48  
49 444

50  
51 445

52  
53 446

54  
55  
56  
57  
58  
59  
60

447

448 **References**

- 449 1 The Equality Act. 2010. <https://www.legislation.gov.uk/ukpga/2010/15/contents>
- 450 2 World Health Organisation. *World report on disability 2011*. World Health Organisation  
451 2011.
- 452 3 Leonardi M, Bickenbach J, Ustun TB, *et al*. The definition of disability: what is in a name?  
453 *The Lancet* 2006;**368**:1219–21. doi:10.1016/S0140-6736(06)69498-1
- 454 4 Department for Work and Pensions. Family Resources Survey 2017-18.  
455 2019.[https://assets.publishing.service.gov.uk/government/uploads/system/uploads/attach  
456 2019.\[ment\\\_data/file/790000/family-resources-survey-2017-18.pdf\]\(https://assets.publishing.service.gov.uk/government/uploads/system/uploads/attachment\_data/file/790000/family-resources-survey-2017-18.pdf\)](https://assets.publishing.service.gov.uk/government/uploads/system/uploads/attachment_data/file/790000/family-resources-survey-2017-18.pdf)
- 457 5 Equality and Human Rights Commission. Being disabled in Britain: A journey less equal.  
458 2017.
- 459 6 Office for National Statistics. Life Opportunities Survey: Wave 3 results.  
460 2015.<https://www.gov.uk/government/statistics/life-opportunities-survey-wave-3-results>
- 461 7 Equality and Human Rights Commission. Hidden in plain sight: inquiry into disability-  
462 related harassment. 2011.[https://www.equalityhumanrights.com/en/publication-  
463 download/hidden-plain-sight-inquiry-disability-related-harassment](https://www.equalityhumanrights.com/en/publication-download/hidden-plain-sight-inquiry-disability-related-harassment) (accessed 28 Mar  
464 2019).
- 465 8 European Union. *Discrimination in the EU in 2015*. 2015.
- 466 9 Sykes W, Groom C, Desai P. Disability-related harassment: the role of public bodies A  
467 qualitative research report. Manchester: : Equality and Human Rights Commission 2011.
- 468 10 Office for National Statistics. Crime Survey for England and Wales 2014-2015. 2016.
- 469 11 Scottish Government. Report of Independent Advisory Group on Hate Crime, Prejudice  
470 and Community Cohesion'. 2016.[https://www.gov.scot/publications/report-independent-  
471 advisory-group-hate-crime-prejudice-community-cohesion/](https://www.gov.scot/publications/report-independent-advisory-group-hate-crime-prejudice-community-cohesion/)
- 472 12 Corcoran H, Lader D, Smith K. Hate crime, England and Wales, 2014 to 2015. 2015.
- 473 13 Coleman N, Sykes W, Groom C. Barriers to employment and unfair treatment at work: a  
474 quantitative analysis of disabled people's experiences. Equality and Human Rights  
475 Commission 2013.
- 476 14 Pascoe EA, Smart Richman L. Perceived discrimination and health: a meta-analytic  
477 review. *Psychol Bull* 2009;**135**:531–54. doi:10.1037/a0016059
- 478 15 Goto JB, Couto PFM, Bastos JL. [Systematic review of epidemiological studies on  
479 interpersonal discrimination and mental health]. *Cad Saude Publica* 2013;**29**:445–59.

- 1  
2  
3 480 16 Schmitt MT, Branscombe NR, Postmes T, *et al.* The consequences of perceived  
4 481 discrimination for psychological well-being: a meta-analytic review. -. *Psychol Bull*  
5 482 2014;**140**:921–48.
- 7  
8 483 17 Ali A, King M, Strydom A, *et al.* Self-reported stigma and symptoms of anxiety and  
9 484 depression in people with intellectual disabilities: Findings from a cross sectional study in  
10 485 England. *J Affect Disord* 2015;**187**:224–31. doi:10.1016/j.jad.2015.07.046
- 12 486 18 Temple JB, Kelaher M. Is disability exclusion associated with psychological distress?  
13 487 Australian evidence from a national cross-sectional survey. *BMJ Open* 2018;**8**:e020829.  
14 488 doi:10.1136/bmjopen-2017-020829
- 16 489 19 Krnjacki L, Priest N, Aitken Z, *et al.* Disability-based discrimination and health: findings  
17 490 from an Australian-based population study. *Aust N Z J Public Health* 2018;**42**:172–4.
- 20 491 20 Wamala S, Bostrom G, Nyqvist K. Perceived discrimination and psychological distress in  
21 492 Sweden. *Br J Psychiatry* 2007;**190**:75–6.
- 23 493 21 Daley A, Phipps S, Branscombe NR. The social complexities of disability: Discrimination,  
24 494 belonging and life satisfaction among Canadian youth. *SSM - Popul Health* 2018;**5**:55–63.  
25 495 doi:10.1016/j.ssmph.2018.05.003
- 27 496 22 Kim S. A Study of the Impact of Discrimination Experience on Life Satisfaction in Korean  
28 497 Women with Severe Disabilities. *World Acad Sci Eng Technol Int J Soc Behav Educ Econ*  
30 498 *Bus Ind Eng* 2015;**9**:3205–9.
- 32 499 23 Kagan M, Itzick M, Tal-Katz P. Demographic, Psychosocial, and Health- and Disability-  
33 500 Related Factors Associated With Psychological Distress Among People With Physical  
34 501 Disabilities. *Rehabil Psychol* 2018;**63**:392–9. doi:10.1037/rep0000206
- 36 502 24 Du Mont J, Forte T. Perceived discrimination and self-rated health in Canada: an  
37 503 exploratory study. *BMC Public Health* 2016;**16**:742. doi:10.1186/s12889-016-3344-y
- 39 504 25 Alvarez-Galvez J, Salvador-Carulla L. Perceived discrimination and self-rated health in  
40 505 Europe: evidence from the European Social Survey (2010). *PloS One* 2013;**8**:e74252.  
42 506 doi:10.1371/journal.pone.0074252
- 44 507 26 Sutin AR, Stephan Y, Carretta H, *et al.* Perceived discrimination and physical, cognitive,  
45 508 and emotional health in older adulthood. *Am J Geriatr Psychiatry Off J Am Assoc Geriatr*  
46 509 *Psychiatry* 2015;**23**:171–9. doi:10.1016/j.jagp.2014.03.007
- 48 510 27 University of Essex. Institute for Social and Economic Research, NatCen Social Research,  
49 511 Kantar Public. *Understanding Society: Waves 1-7, 2009-2016 and Harmonised BHPS:*  
51 512 *Waves 1-18, 1991-2009.* 9th Edition. UK data service 2017.
- 53 513 28 McFall S, Nandi A, Platt L. *Understanding Society: UK Household Longitudinal Study:*  
54 514 *User Guide to Ethnicity and Immigration Research.* 4th ed. Colchester: : University of  
55 515 Essex 2017.
- 57 516 29 Knies G. *Understanding society: The UK household longitudinal study, Waves 1–7 (User*  
58 517 *Guide).* University of Essex: : Colchester: Institute for Social and Economic Research  
59 518 2017.

- 1  
2  
3 519 30 Goldberg D, Williams P. *A user's guide to the General Health Questionnaire*. Basingstoke:  
4 520 : NFER-Nelson 1988.
- 5  
6 521 31 Ware J, Kosinski M, Keller SD. A 12-Item Short-Form Health Survey: construction of  
7 522 scales and preliminary tests of reliability and validity. *Med Care* 1996;**34**:220–33.
- 8  
9 523 32 Ware JE. *How to score version 2 of the SF-12 health survey (with a supplement*  
10 524 *documenting version 1) Edition: first*. Lincoln, RI: : Health Assessment Lab 2002.
- 11  
12  
13 525 33 Steptoe A, Jackson SE. The Life Skills of Older Americans: Association with Economic,  
14 526 Psychological, Social, and Health Outcomes. *Sci Rep* 2018;**8**:9669. doi:10.1038/s41598-  
15 527 018-27909-w
- 16  
17 528 34 DeSalvo KB, Bloser N, Reynolds K, *et al*. Mortality prediction with a single general self-  
18 529 rated health question. A meta-analysis. *J Gen Intern Med* 2006;**21**:267–75.  
20 530 doi:10.1111/j.1525-1497.2005.00291.x
- 21  
22 531 35 OECD. *What are equivalence scales?* 2005.
- 23  
24 532 36 Alvarez A, Faccioli J, Guinzbourg M, *et al*. Endocrine and inflammatory profiles in type 2  
25 533 diabetic patients with and without major depressive disorder. *BMC Res Notes* 2013;**6**:61.  
26 534 doi:10.1186/1756-0500-6-61
- 27  
28 535 37 Rogers SE, Thrasher AD, Miao Y, *et al*. Discrimination in Healthcare Settings is  
29 536 Associated with Disability in Older Adults: Health and Retirement Study, 2008-2012. *J*  
30 537 *Gen Intern Med* 2015;**30**:1413–20. doi:10.1007/s11606-015-3233-6
- 31  
32  
33 538 38 Moscoso-Porras MG, Alvarado GF. Association between perceived discrimination and  
34 539 healthcare-seeking behavior in people with a disability. *Disabil Health J* 2018;**11**:93–8.  
35 540 doi:10.1016/j.dhjo.2017.04.002
- 36  
37 541 39 Wamala S, Merlo J, Boström G, *et al*. Perceived discrimination, socioeconomic  
38 542 disadvantage and refraining from seeking medical treatment in Sweden. *J Epidemiol*  
39 543 *Community Health* 2007;**61**:409–15. doi:10.1136/jech.2006.049999
- 40  
41  
42 544 40 Ali A, Scior K, Ratti V, *et al*. Discrimination and other barriers to accessing health care:  
43 545 perspectives of patients with mild and moderate intellectual disability and their carers. *PloS*  
44 546 *One* 2013;**8**:e70855. doi:10.1371/journal.pone.0070855
- 45  
46 547 41 Vaghela P, Sutin AR. Discrimination and sleep quality among older US adults: the  
47 548 mediating role of psychological distress. *Sleep Health J Natl Sleep Found* 2016;**2**:100–8.  
48 549 doi:10.1016/j.sleh.2016.02.003
- 49  
50  
51 550 42 Li Li DM. disability and illicit drug use: an application of labeling theory. *Deviant Behav*  
52 551 2001;**22**:1–21. doi:10.1080/016396201750065784
- 53  
54 552 43 Wansink B, Cheney MM, Chan N. Exploring comfort food preferences across age and  
55 553 gender. *Physiol Behav* 2003;**79**:739–47.
- 56  
57 554 44 Sutin A, Robinson E, Daly M, *et al*. Weight discrimination and unhealthy eating-related  
58 555 behaviors. *Appetite* 2016;**102**:83–9. doi:10.1016/j.appet.2016.02.016
- 59  
60



- 1  
2  
3 556 45 McEwen BS. Stress, adaptation, and disease. Allostasis and allostatic load. *Ann N Y Acad*  
4 557 *Sci* 1998;**840**:33–44.
- 6 558 46 Lockwood KG, Marsland AL, Matthews KA, *et al.* Perceived discrimination and  
7 559 cardiovascular health disparities: a multisystem review and health neuroscience  
8 560 perspective. *Ann N Y Acad Sci* 2018;**1428**:170–207. doi:10.1111/nyas.13939
- 11 561 47 Busse D, Yim IS, Campos B, *et al.* Discrimination and the HPA axis: current evidence and  
12 562 future directions. *J Behav Med* 2017;**40**:539–52. doi:10.1007/s10865-017-9830-6
- 14 563 48 Korous KM, Causadias JM, Casper DM. Racial discrimination and cortisol output: A meta-  
15 564 analysis. *Soc Sci Med* 1982 2017;**193**:90–100. doi:10.1016/j.socscimed.2017.09.042
- 17 565 49 Jackson SE, Kirschbaum C, Steptoe A. Perceived weight discrimination and chronic  
18 566 biochemical stress: A population-based study using cortisol in scalp hair. *Obes Silver*  
19 567 *Spring Md* 2016;**24**:2515–21. doi:10.1002/oby.21657
- 22 568 50 Sutin AR, Stephan Y, Luchetti M, *et al.* Perceived weight discrimination and C-reactive  
23 569 protein. *Obes Silver Spring Md* 2014;**22**:1959–61. doi:10.1002/oby.20789
- 25 570 51 Slavich GM, Irwin MR. From stress to inflammation and major depressive disorder: a  
26 571 social signal transduction theory of depression. *Psychol Bull* 2014;**140**:774–815.  
27 572 doi:10.1037/a0035302
- 29 573 52 Alonso J, Buron A, Bruffaerts R, *et al.* Association of perceived stigma and mood and  
30 574 anxiety disorders: results from the World Mental Health Surveys. *Acta Psychiatr Scand*  
31 575 2008;**118**:305–14.
- 34 576 53 Beckett AE, Buckner L. Promoting positive attitudes towards disabled people: definition  
35 577 of, rationale and prospects for anti-disablist education. *Br J Sociol Educ* 2012;**33**:873–91.  
36 578 doi:10.1080/01425692.2012.692046
- 38 579 54 Silverman AM, Molton IR, Smith AE, *et al.* Solace in solidarity: Disability friendship  
39 580 networks buffer well-being. *Rehabil Psychol*; **62**:525–33.
- 42 581 55 Itzick M, Kagan M, Tal-Katz P. Perceived social support as a moderator between perceived  
43 582 discrimination and subjective well-being among people with physical disabilities in Israel.  
44 583 *Disabil Rehabil* 2018;**40**:2208–16. doi:10.1080/09638288.2017.1331380

**Table 1** Associations between perceived disability discrimination and sociodemographic factors at wave 1 (2009/10)

|                      | <b>No perceived<br/>discrimination</b> | <b>Perceived<br/>discrimination</b> | <b><i>p</i></b> |
|----------------------|----------------------------------------|-------------------------------------|-----------------|
|                      | <b>(<i>n</i> = 754)</b>                | <b>(<i>n</i> = 117)</b>             |                 |
| Age (years)          | 53.42 (16.56)                          | 48.29 (14.89)                       | 0.001           |
| 17-34                | 100 (13.3%)                            | 20 (17.1%)                          |                 |
| 35-44                | 149 (19.8%)                            | 23 (19.7%)                          |                 |
| 45-54                | 150 (19.9%)                            | 34 (29.1%)                          |                 |
| 55-64                | 134 (17.8%)                            | 23 (19.7%)                          |                 |
| 65+                  | 221 (29.3%)                            | 17 (14.5%)                          |                 |
| Sex (% men)          | 334 (44.3%)                            | 54 (46.2%)                          | 0.707           |
| Household income (£) | 1123.28 (930.47)                       | 1087.07 (698.65)                    | 0.687           |
| £0-499               | 105 (13.9%)                            | 12 (10.3%)                          |                 |
| £500-999             | 314 (41.6%)                            | 55 (47.0%)                          |                 |
| £1000-1499           | 189 (25.1%)                            | 27 (23.1%)                          |                 |
| £1500-1999           | 77 (10.2%)                             | 13 (11.1%)                          |                 |
| £2000+               | 69 (9.2%)                              | 10 (8.5%)                           |                 |
| Education (% yes)    |                                        |                                     | 0.003           |
| University Degree    | 171 (22.7%)                            | 33 (28.2%)                          | -               |
| School qualification | 285 (37.8%)                            | 57 (48.7%)                          | -               |
| No qualification     | 298 (39.5%)                            | 27 (23.1%)                          | -               |
| Ethnicity            |                                        |                                     | 0.002           |
| White                | 153 (20.3%)                            | 32 (27.4%)                          | -               |
| South Asian          | 333 (44.2%)                            | 36 (30.8%)                          | -               |
| Black                | 168 (22.3%)                            | 21 (17.9%)                          | -               |

|                 |             |            |         |
|-----------------|-------------|------------|---------|
| Other           | 100 (13.3%) | 28 (23.9%) | -       |
| Disability type |             |            | < 0.001 |
| Physical        | 351 (46.6%) | 16 (13.7%) |         |
| Sensory         | 84 (11.1%)  | 11 (9.4%)  |         |
| Cognitive       | 73 (9.7%)   | 14 (12.0%) |         |
| Other           | 246 (32.6%) | 76 (65.0%) |         |

Data are presented as means (SD) and n (%)

For peer review only

**Table 2:** Cross-sectional and prospective associations between perceived disability discrimination and emotional wellbeing outcomes

|                             | Cross-sectional |                             |     |                          | Prospective |                             |    |                          |
|-----------------------------|-----------------|-----------------------------|-----|--------------------------|-------------|-----------------------------|----|--------------------------|
|                             | n               | No perceived discrimination | n   | Perceived discrimination | n           | No perceived discrimination | n  | Perceived discrimination |
| Depression                  |                 |                             |     |                          |             |                             |    |                          |
| % (SE)                      | 751             | 9.3 (0.11)                  | 117 | 38.4 (0.03)              | -           | -                           | -  | -                        |
| OR [95%CI]                  |                 | Ref                         |     | 5.40 [3.25; 8.97]***     |             | -                           |    | -                        |
| Psychological distress      |                 |                             |     |                          |             |                             |    |                          |
| Mean score (SE)             | 454             | 2.93 (0.17)                 | 82  | 6.21 (0.40)              | 177         | 2.53 (0.26)                 | 31 | 5.40 (0.68)              |
| Coeff. [95%CI]              |                 | Ref                         |     | 3.28 [2.41; 4.14]***     |             | Ref                         |    | 2.88 [1.39; 4.36]***     |
| SF-12 mental                |                 |                             |     |                          |             |                             |    |                          |
| Mean score (SE)             | 742             | 44.87 (0.42)                | 117 | 37.57 (1.10)             | 239         | 45.24 (0.69)                | 43 | 40.12 (1.74)             |
| Coeff. [95%CI]              |                 | Ref                         |     | -7.35 [-9.70; -5.02]***  |             | Ref                         |    | -5.12 [-8.91; -1.34]**   |
| Life satisfaction           |                 |                             |     |                          |             |                             |    |                          |
| Mean score (SE)             | 454             | 4.69 (0.08)                 | 84  | 3.42 (0.18)              | 171         | 4.67 (0.12)                 | 34 | 4.14 (0.29)              |
| Coeff. [95%CI]              |                 | Ref                         |     | -1.27 [-1.66; -0.87]***  |             | Ref                         |    | -0.53 [-1.18; 0.11]      |
| Fair/poor self-rated health |                 |                             |     |                          |             |                             |    |                          |
| % (SE)                      | 754             | 69.7 (0.01)                 | 117 | 80.7 (0.04)              | 385         | 62.1 (0.02)                 | 55 | 67.3 (0.06)              |
| OR [95%CI]                  |                 | 1.00 (Ref)                  |     | 2.05 [1.19; 3.51]**      |             | 1.00 (Ref)                  |    | 1.29 [0.59; 2.83]        |

All analyses are adjusted for age, sex, household income, education, ethnicity and disability type. Prospective analyses are additionally adjusted for baseline wellbeing status/score.

Coeff = unstandardized B coefficient (white rows), CI = confidence interval, OR = odds ratio (grey rows), SE = standard error.

\* $p < 0.05$ , \*\* $p < 0.01$ , \*\*\* $p < 0.001$

Possible scores on the psychological distress scale range from 0-12, SF-12 mental component scale range from 0-100 and the life satisfaction scale scores range from 0-7.

1  
2  
3  
4  
5  
6  
7  
8  
9  
10  
11  
12  
13  
14  
15  
16  
17  
18  
19  
20  
21  
22  
23  
24  
25  
26  
27  
28  
29  
30  
31  
32  
33  
34  
35  
36  
37  
38  
39  
40  
41  
42  
43  
44  
45  
46

**Table 3:** Cross-sectional and prospective associations between perceived disability discrimination and emotional wellbeing outcomes (complete cases at wave 5)

|                             | Cross-sectional |                             |    |                          | Prospective |                             |    |                          |
|-----------------------------|-----------------|-----------------------------|----|--------------------------|-------------|-----------------------------|----|--------------------------|
|                             | n               | No perceived discrimination | n  | Perceived discrimination | n           | No perceived discrimination | n  | Perceived discrimination |
| Psychological distress      |                 |                             |    |                          |             |                             |    |                          |
| Mean score (SE)             | 177             | 2.81 (0.26)                 | 31 | 5.46 (0.66)              | 177         | 2.53 (0.26)                 | 31 | 5.40 (0.68)              |
| Coeff. [95%CI]              |                 | Ref                         |    | 2.65 [1.21; 4.08]***     |             | Ref                         |    | 2.88 [1.39; 4.36]***     |
| SF-12 mental                |                 |                             |    |                          |             |                             |    |                          |
| Mean score (SE)             | 239             | 45.89 (0.71)                | 43 | 38.69 (1.76)             | 239         | 45.24 (0.69)                | 43 | 40.12 (1.74)             |
| Coeff. [95%CI]              |                 | Ref                         |    | -7.20 [-11.01; -3.39]*** |             | Ref                         |    | -5.12 [-8.91; -1.34]**   |
| Life satisfaction           |                 |                             |    |                          |             |                             |    |                          |
| Mean score (SE)             | 171             | 4.78 (0.12)                 | 34 | 3.50 (0.29)              | 171         | 4.67 (0.12)                 | 34 | 4.14 (0.29)              |
| Coeff. [95%CI]              |                 | Ref                         |    | -1.27 [-1.91; -0.63]***  |             | Ref                         |    | -0.53 [-1.18; 0.11]      |
| Fair/poor self-rated health |                 |                             |    |                          |             |                             |    |                          |
| % (SE)                      | 385             | 66.5 (0.02)                 | 55 | 81.6 (0.06)              | 385         | 62.1 (0.02)                 | 55 | 67.3 (0.06)              |
| OR [95%CI]                  |                 | 1.00 (Ref)                  |    | 2.66 [1.16; 6.08]*       |             | 1.00 (Ref)                  |    | 1.29 [0.59; 2.83]        |

All analyses are adjusted for age, sex, household income, education, ethnicity and disability type. Prospective analyses are additionally adjusted for baseline wellbeing status/score.

Coeff = unstandardized B coefficient (white rows), CI = confidence interval, OR = odds ratio (grey rows), SE = standard error.

\*p<0.05, \*\*p<0.01, \*\*\*p <0.001

Possible scores on the psychological distress scale range from 0-12, SF-12 mental component scale range from 0-100 and the life satisfaction scale scores range from 0-7.

**Table 4** Participant characteristics at wave 1 (2009/10) of complete cases and those lost to follow-up

|                      | Lost to follow-up<br>(n=431) | Complete cases<br>(n=440) | <i>p</i> |
|----------------------|------------------------------|---------------------------|----------|
| Age (years)          | 52.26 (17.08)                | 53.19 (15.76)             | 0.407    |
| 17-34                | 25 (5.8%)                    | 12 (2.7%)                 |          |
| 35-44                | 46 (10.7%)                   | 37 (8.4%)                 |          |
| 45-54                | 79 (18.4%)                   | 93 (21.1%)                |          |
| 55-64                | 91 (21.2%)                   | 93 (21.1%)                |          |
| 65+                  | 189 (44.0%)                  | 205 (46.6%)               |          |
| Sex (% men)          | 200 (46.4%)                  | 188 (42.7%)               | 0.275    |
| Household income (£) | 1101.26 (1037.11)            | 1135.22 (748.46)          | 0.579    |
| £0-499               | 69 (16.0%)                   | 48 (10.9%)                |          |
| £500-999             | 175 (40.6%)                  | 194 (44.1%)               |          |
| £1000-1499           | 113 (26.2%)                  | 103 (23.4%)               |          |
| £1500-1999           | 42 (9.7%)                    | 48 (10.9%)                |          |
| £2000+               | 32 (7.4%)                    | 47 (10.7%)                |          |
| Education (% yes)    |                              |                           | 0.024    |
| University Degree    | 85 (19.7%)                   | 119 (27.0%)               | -        |
| School qualification | 171 (39.7%)                  | 171 (38.9%)               | -        |
| No qualification     | 175 (40.6%)                  | 150 (34.1%)               | -        |
| Ethnicity            |                              |                           | 0.213    |
| White                | 88 (20.4%)                   | 97 (22.0%)                | -        |
| South Asian          | 172 (39.9%)                  | 197 (44.8%)               | -        |

|                                 |               |               |       |
|---------------------------------|---------------|---------------|-------|
| Black                           | 105 (24.4%)   | 84 (19.1%)    | -     |
| Other                           | 66 (15.3%)    | 62 (14.1%)    | -     |
| Disability type                 |               |               | 0.189 |
| Physical                        | 166 (38.5%)   | 201 (45.7%)   |       |
| Sensory                         | 51 (11.8%)    | 44 (10.0%)    |       |
| Cognitive                       | 47 (10.9%)    | 40 (9.1%)     |       |
| Other                           | 167 (38.7%)   | 155 (35.2%)   |       |
| Mental health/wellbeing         |               |               |       |
| Psychological distress          | 3.46 (3.85)   | 3.41 (3.86)   | 0.874 |
| SF-12                           | 43.72 (12.93) | 44.01 (12.30) | 0.741 |
| Life satisfaction               | 4.40 (1.75)   | 4.56 (1.69)   | 0.306 |
| Self-rated health (% fair/poor) | 319 (74.0%)   | 301 (68.4%)   | 0.068 |

Data are presented as means (SD) and n (%)

\*Complete cases are defined as those who were present at wave 1 and provided data on at least one wellbeing measure at wave 5.

**Table 5:** Sensitivity analysis: Perceived disability discrimination measure excluding each discriminatory behaviour in turn

| <b>Cross-sectional analyses (wave 1)</b> |                | <b>Model 1</b>         | <b>Model 2</b>          | <b>Model 3</b>         | <b>Model 4</b>         |
|------------------------------------------|----------------|------------------------|-------------------------|------------------------|------------------------|
| Depression                               | OR [95%CI]     | 4.41 (2.55;7.60)***    | 5.24 (3.06;8.98)***     | 4.80 (2.92;7.88)***    | 5.41 (3.26;8.98)***    |
| Psychological distress                   | Coeff. [95%CI] | 3.64 (2.68;4.60)***    | 3.28 (2.33;4.23)***     | 3.13 (2.26;4.01)***    | 3.27 (2.41;4.14)***    |
| SF-12 mental                             | Coeff. [95%CI] | -6.63 (-9.29;-3.97)*** | -7.61 (-10.15;-5.08)*** | -7.53 (-9.89;-5.18)*** | -7.35 (-9.68;-5.02)*** |
| Life satisfaction                        | Coeff. [95%CI] | -1.23 (-1.69;-0.76)*** | -1.45 (-1.88;-1.02)***  | -1.24 (-1.64;-0.85)*** | -1.27 (-1.66;-0.87)*** |
| Fair/poor self-rated health              | OR [95%CI]     | 1.92 (1.04;3.53)*      | 2.39 (1.32;4.33)**      | 2.21 (1.28;3.81)**     | 2.04 (1.19;3.50)**     |
| <b>Prospective analyses (wave 5)</b>     |                | <b>Model 1</b>         | <b>Model 2</b>          | <b>Model 3</b>         | <b>Model 4</b>         |
| Psychological distress                   | Coeff. [95%CI] | 2.78 (1.14;4.41)***    | 2.69 (1.15;4.24)***     | 2.89 (1.45;4.33)***    | 2.88 (1.39;4.36)***    |
| SF-12 mental                             | Coeff. [95%CI] | -4.33 (-8.81;0.14)     | -4.90 (-8.86;-0.94)**   | -5.94 (-9.59;-2.28)**  | -5.13 (-8.91;-1.34)**  |
| Life satisfaction                        | Coeff. [95%CI] | -0.39 (-1.14;0.36)     | -0.37 (-1.06;0.32)      | -0.39 (-1.02;0.25)     | -0.53 (-1.18;0.11)     |
| Fair/poor self-rated health              | OR [95%CI]     | 1.23 (0.50;3.03)       | 1.30 (0.57;2.95)        | 1.31 (0.61;2.83)       | 1.29 (0.59;2.83)       |

All analyses are adjusted for age, sex, household income, education, ethnicity and disability type. Prospective analyses are additionally adjusted for baseline wellbeing status/score.

Model 1 excludes “*felt unsafe at some place*” from the measure of perceived gender discrimination; Model 2 excludes “*avoided some place*”; Model 3 excludes “*was insulted at some place*”; and Model 4 excludes “*was attacked at some place*”

Coeff = unstandardized B coefficient (white rows), CI = confidence interval, OR = odds ratio (grey rows), SE = standard error.

\* $p < 0.05$ , \*\* $p < 0.01$ , \*\*\* $p < 0.001$

Possible scores on the psychological distress scale range from 0-12, SF-12 mental component scale range from 0-100 and the life satisfaction scale scores range from 0-7.



Supplementary table 1: Perceived disability discrimination types and settings by type of disability

| Types of discrimination    | Physical   | Sensory   | Cognitive  | Other      | p value |
|----------------------------|------------|-----------|------------|------------|---------|
| Felt unsafe at someplace   | 12 (85.7%) | 9 (90%)   | 12 (92.3%) | 60 (84.5%) | 0.874   |
| Avoided at someplace       | 8 (53.3%)  | 6 (75%)   | 9 (75%)    | 52 (69.3%) | 0.336   |
| Felt insulted at someplace | 3 (25%)    | 1 (12.5%) | 1 (10%)    | 15 (27.3%) | 0.572   |
| Attacked at someplace      | 0 (0%)     | 0 (0%)    | 0(0%)      | 3(4.4%)    | 0.621   |
| <b>Settings</b>            |            |           |            |            |         |
| School/work                | 2 (12.5%)  | 1 (9.1%)  | 0 (0%)     | 12 (15.8%) | 0.424   |
| Public transport           | 10 (62.5%) | 3 (27.3%) | 6 (42.9%)  | 41 (53.9%) | 0.266   |
| Bus or train stations      | 5 (31.3%)  | 2 (18.2%) | 6 (42.9%)  | 34 (44.7%) | 0.328   |
| Taxis                      | 4 (25%)    | 0 (0%)    | 1 (7.1%)   | 9 (11.8%)  | 0.223   |
| Public buildings           | 8 (50%)    | 7 (63.6%) | 7 (50%)    | 48 (63.2%) | 0.654   |
| On the street              | 12 (75%)   | 8 (72.7%) | 9 (64.3%)  | 62 (81.6%) | 0.504   |
| At home                    | 3 (18.8%)  | 3 (27.3%) | 4 (28.6%)  | 20 (26.3%) | 0.920   |

Data are presented as numbers (% yes)

# Reporting checklist for cohort study.

Based on the STROBE cohort guidelines.

## Instructions to authors

Complete this checklist by entering the page numbers from your manuscript where readers will find each of the items listed below.

Your article may not currently address all the items on the checklist. Please modify your text to include the missing information. If you are certain that an item does not apply, please write "n/a" and provide a short explanation.

Upload your completed checklist as an extra file when you submit to a journal.

In your methods section, say that you used the STROBE cohort reporting guidelines, and cite them as:

von Elm E, Altman DG, Egger M, Pocock SJ, Gøtzsche PC, Vandenbroucke JP. The Strengthening of Reporting of Observational Studies in Epidemiology (STROBE) Statement: guidelines for reporting observational studies.

|                           |                     |                                                                                    | Page   |
|---------------------------|---------------------|------------------------------------------------------------------------------------|--------|
|                           |                     | Reporting Item                                                                     | Number |
| <b>Title and abstract</b> |                     |                                                                                    |        |
| Title                     | <a href="#">#1a</a> | Indicate the study's design with a commonly used term in the title or the abstract | 1      |
| Abstract                  | <a href="#">#1b</a> | Provide in the abstract an informative and balanced summary                        | 2      |

of what was done and what was found

## Introduction

Background / [#2](#) Explain the scientific background and rationale for the 4  
 rationale investigation being reported

Objectives [#3](#) State specific objectives, including any prespecified 6  
 hypotheses

## Methods

Study design [#4](#) Present key elements of study design early in the paper 6

Setting [#5](#) Describe the setting, locations, and relevant dates, including 6  
 periods of recruitment, exposure, follow-up, and data collection

Eligibility criteria [#6a](#) Give the eligibility criteria, and the sources and methods of 6  
 selection of participants. Describe methods of follow-up.

Eligibility criteria [#6b](#) For matched studies, give matching criteria and number of N/A  
 exposed and unexposed

Variables [#7](#) Clearly define all outcomes, exposures, predictors, potential 7-8  
 confounders, and effect modifiers. Give diagnostic criteria, if applicable

Data sources / [#8](#) For each variable of interest give sources of data and details of 7-8  
 measurement methods of assessment (measurement). Describe comparability of assessment methods if there is more than one group. Give information separately for for exposed and unexposed groups if applicable.

|    |                |                      |                                                                   |      |
|----|----------------|----------------------|-------------------------------------------------------------------|------|
| 1  | Bias           | <a href="#">#9</a>   | Describe any efforts to address potential sources of bias         | 8    |
| 2  |                |                      |                                                                   |      |
| 3  |                |                      |                                                                   |      |
| 4  | Study size     | <a href="#">#10</a>  | Explain how the study size was arrived at                         | 6    |
| 5  |                |                      |                                                                   |      |
| 6  |                |                      |                                                                   |      |
| 7  | Quantitative   | <a href="#">#11</a>  | Explain how quantitative variables were handled in the            | 9    |
| 8  | variables      |                      | analyses. If applicable, describe which groupings were chosen,    |      |
| 9  |                |                      | and why                                                           |      |
| 10 |                |                      |                                                                   |      |
| 11 |                |                      |                                                                   |      |
| 12 |                |                      |                                                                   |      |
| 13 |                |                      |                                                                   |      |
| 14 |                |                      |                                                                   |      |
| 15 | Statistical    | <a href="#">#12a</a> | Describe all statistical methods, including those used to control | 9    |
| 16 | methods        |                      | for confounding                                                   |      |
| 17 |                |                      |                                                                   |      |
| 18 |                |                      |                                                                   |      |
| 19 |                |                      |                                                                   |      |
| 20 | Statistical    | <a href="#">#12b</a> | Describe any methods used to examine subgroups and                | 9    |
| 21 | methods        |                      | interactions                                                      |      |
| 22 |                |                      |                                                                   |      |
| 23 |                |                      |                                                                   |      |
| 24 |                |                      |                                                                   |      |
| 25 |                |                      |                                                                   |      |
| 26 | Statistical    | <a href="#">#12c</a> | Explain how missing data were addressed                           | 6    |
| 27 | methods        |                      |                                                                   |      |
| 28 |                |                      |                                                                   |      |
| 29 |                |                      |                                                                   |      |
| 30 |                |                      |                                                                   |      |
| 31 | Statistical    | <a href="#">#12d</a> | If applicable, explain how loss to follow-up was addressed        | 6    |
| 32 | methods        |                      |                                                                   |      |
| 33 |                |                      |                                                                   |      |
| 34 |                |                      |                                                                   |      |
| 35 |                |                      |                                                                   |      |
| 36 | Statistical    | <a href="#">#12e</a> | Describe any sensitivity analyses                                 | 9-10 |
| 37 | methods        |                      |                                                                   |      |
| 38 |                |                      |                                                                   |      |
| 39 |                |                      |                                                                   |      |
| 40 |                |                      |                                                                   |      |
| 41 |                |                      |                                                                   |      |
| 42 | <b>Results</b> |                      |                                                                   |      |
| 43 |                |                      |                                                                   |      |
| 44 |                |                      |                                                                   |      |
| 45 | Participants   | <a href="#">#13a</a> | Report numbers of individuals at each stage of study—eg           | 6    |
| 46 |                |                      | numbers potentially eligible, examined for eligibility, confirmed |      |
| 47 |                |                      | eligible, included in the study, completing follow-up, and        |      |
| 48 |                |                      | analysed. Give information separately for for exposed and         |      |
| 49 |                |                      | unexposed groups if applicable.                                   |      |
| 50 |                |                      |                                                                   |      |
| 51 |                |                      |                                                                   |      |
| 52 |                |                      |                                                                   |      |
| 53 |                |                      |                                                                   |      |
| 54 |                |                      |                                                                   |      |
| 55 |                |                      |                                                                   |      |
| 56 |                |                      |                                                                   |      |
| 57 | Participants   | <a href="#">#13b</a> | Give reasons for non-participation at each stage                  | N/A  |
| 58 |                |                      |                                                                   |      |
| 59 |                |                      |                                                                   |      |
| 60 |                |                      |                                                                   |      |

|    |                   |                      |                                                                   |     |
|----|-------------------|----------------------|-------------------------------------------------------------------|-----|
| 1  | Participants      | <a href="#">#13c</a> | Consider use of a flow diagram                                    | N/A |
| 2  |                   |                      |                                                                   |     |
| 3  |                   |                      |                                                                   |     |
| 4  | Descriptive data  | <a href="#">#14a</a> | Give characteristics of study participants (eg demographic,       | 10  |
| 5  |                   |                      | clinical, social) and information on exposures and potential      |     |
| 6  |                   |                      | confounders. Give information separately for exposed and          |     |
| 7  |                   |                      | unexposed groups if applicable.                                   |     |
| 8  |                   |                      |                                                                   |     |
| 9  |                   |                      |                                                                   |     |
| 10 |                   |                      |                                                                   |     |
| 11 |                   |                      |                                                                   |     |
| 12 |                   |                      |                                                                   |     |
| 13 |                   |                      |                                                                   |     |
| 14 | Descriptive data  | <a href="#">#14b</a> | Indicate number of participants with missing data for each        | 6   |
| 15 |                   |                      | variable of interest                                              |     |
| 16 |                   |                      |                                                                   |     |
| 17 |                   |                      |                                                                   |     |
| 18 |                   |                      |                                                                   |     |
| 19 | Descriptive data  | <a href="#">#14c</a> | Summarise follow-up time (eg, average and total amount)           | 6   |
| 20 |                   |                      |                                                                   |     |
| 21 |                   |                      |                                                                   |     |
| 22 |                   |                      |                                                                   |     |
| 23 | Outcome data      | <a href="#">#15</a>  | Report numbers of outcome events or summary measures              | N/A |
| 24 |                   |                      | over time. Give information separately for exposed and            |     |
| 25 |                   |                      | unexposed groups if applicable.                                   |     |
| 26 |                   |                      |                                                                   |     |
| 27 |                   |                      |                                                                   |     |
| 28 |                   |                      |                                                                   |     |
| 29 |                   |                      |                                                                   |     |
| 30 | Main results      | <a href="#">#16a</a> | Give unadjusted estimates and, if applicable, confounder-         | 11  |
| 31 |                   |                      | adjusted estimates and their precision (eg, 95% confidence        |     |
| 32 |                   |                      | interval). Make clear which confounders were adjusted for and     |     |
| 33 |                   |                      | why they were included                                            |     |
| 34 |                   |                      |                                                                   |     |
| 35 |                   |                      |                                                                   |     |
| 36 |                   |                      |                                                                   |     |
| 37 |                   |                      |                                                                   |     |
| 38 |                   |                      |                                                                   |     |
| 39 |                   |                      |                                                                   |     |
| 40 | Main results      | <a href="#">#16b</a> | Report category boundaries when continuous variables were         | 9   |
| 41 |                   |                      | categorized                                                       |     |
| 42 |                   |                      |                                                                   |     |
| 43 |                   |                      |                                                                   |     |
| 44 |                   |                      |                                                                   |     |
| 45 | Main results      | <a href="#">#16c</a> | If relevant, consider translating estimates of relative risk into | N/A |
| 46 |                   |                      | absolute risk for a meaningful time period                        |     |
| 47 |                   |                      |                                                                   |     |
| 48 |                   |                      |                                                                   |     |
| 49 |                   |                      |                                                                   |     |
| 50 |                   |                      |                                                                   |     |
| 51 | Other analyses    | <a href="#">#17</a>  | Report other analyses done—e.g., analyses of subgroups and        | 12  |
| 52 |                   |                      | interactions, and sensitivity analyses                            |     |
| 53 |                   |                      |                                                                   |     |
| 54 |                   |                      |                                                                   |     |
| 55 |                   |                      |                                                                   |     |
| 56 | <b>Discussion</b> |                      |                                                                   |     |
| 57 |                   |                      |                                                                   |     |
| 58 |                   |                      |                                                                   |     |
| 59 |                   |                      |                                                                   |     |
| 60 |                   |                      |                                                                   |     |

|    |                          |                     |                                                                      |       |
|----|--------------------------|---------------------|----------------------------------------------------------------------|-------|
| 1  | Key results              | <a href="#">#18</a> | Summarise key results with reference to study objectives             | 12    |
| 2  |                          |                     |                                                                      |       |
| 3  |                          |                     |                                                                      |       |
| 4  | Limitations              | <a href="#">#19</a> | Discuss limitations of the study, taking into account sources of     | 16    |
| 5  |                          |                     | potential bias or imprecision. Discuss both direction and            |       |
| 6  |                          |                     | magnitude of any potential bias.                                     |       |
| 7  |                          |                     |                                                                      |       |
| 8  |                          |                     |                                                                      |       |
| 9  |                          |                     |                                                                      |       |
| 10 |                          |                     |                                                                      |       |
| 11 |                          |                     |                                                                      |       |
| 12 | Interpretation           | <a href="#">#20</a> | Give a cautious overall interpretation considering objectives,       | 12-14 |
| 13 |                          |                     | limitations, multiplicity of analyses, results from similar studies, |       |
| 14 |                          |                     | and other relevant evidence.                                         |       |
| 15 |                          |                     |                                                                      |       |
| 16 |                          |                     |                                                                      |       |
| 17 |                          |                     |                                                                      |       |
| 18 |                          |                     |                                                                      |       |
| 19 | Generalisability         | <a href="#">#21</a> | Discuss the generalisability (external validity) of the study        | 16-17 |
| 20 |                          |                     | results                                                              |       |
| 21 |                          |                     |                                                                      |       |
| 22 |                          |                     |                                                                      |       |
| 23 |                          |                     |                                                                      |       |
| 24 |                          |                     |                                                                      |       |
| 25 | <b>Other Information</b> |                     |                                                                      |       |
| 26 |                          |                     |                                                                      |       |
| 27 |                          |                     |                                                                      |       |
| 28 | Funding                  | <a href="#">#22</a> | Give the source of funding and the role of the funders for the       | 1     |
| 29 |                          |                     | present study and, if applicable, for the original study on which    |       |
| 30 |                          |                     | the present article is based                                         |       |
| 31 |                          |                     |                                                                      |       |
| 32 |                          |                     |                                                                      |       |
| 33 |                          |                     |                                                                      |       |
| 34 |                          |                     |                                                                      |       |
| 35 |                          |                     |                                                                      |       |

36 None The STROBE checklist is distributed under the terms of the Creative Commons Attribution  
 37 License CC-BY. This checklist can be completed online using <https://www.goodreports.org/>, a tool  
 38 made by the [EQUATOR Network](#) in collaboration with [Penelope.ai](#)  
 39  
 40  
 41  
 42  
 43  
 44  
 45  
 46  
 47  
 48  
 49  
 50  
 51  
 52  
 53  
 54  
 55  
 56  
 57  
 58  
 59

# BMJ Open

## Disability discrimination and wellbeing: A prospective analysis

|                                 |                                                                                                                                                                                                                                                                                                                                                                                                      |
|---------------------------------|------------------------------------------------------------------------------------------------------------------------------------------------------------------------------------------------------------------------------------------------------------------------------------------------------------------------------------------------------------------------------------------------------|
| Journal:                        | <i>BMJ Open</i>                                                                                                                                                                                                                                                                                                                                                                                      |
| Manuscript ID                   | bmjopen-2019-035714.R1                                                                                                                                                                                                                                                                                                                                                                               |
| Article Type:                   | Original research                                                                                                                                                                                                                                                                                                                                                                                    |
| Date Submitted by the Author:   | 20-Jan-2020                                                                                                                                                                                                                                                                                                                                                                                          |
| Complete List of Authors:       | Hackett, Ruth; King's College London, Health Psychology Section; University College London, Behavioural Science and Health<br>Steptoe, Andrew; University College London, Behavioural Science and Health<br>Lang, Raymond; University College London, Leonard Cheshire Research Centre, Epidemiology and Public Health<br>Jackson, Sarah ; University College London, Behavioural Science and Health |
| <b>Primary Subject Heading</b>: | Epidemiology                                                                                                                                                                                                                                                                                                                                                                                         |
| Secondary Subject Heading:      | Mental health                                                                                                                                                                                                                                                                                                                                                                                        |
| Keywords:                       | EPIDEMIOLOGY, MENTAL HEALTH, PUBLIC HEALTH                                                                                                                                                                                                                                                                                                                                                           |
|                                 |                                                                                                                                                                                                                                                                                                                                                                                                      |

SCHOLARONE™  
 Manuscripts



I, the Submitting Author has the right to grant and does grant on behalf of all authors of the Work (as defined in the below author licence), an exclusive licence and/or a non-exclusive licence for contributions from authors who are: i) UK Crown employees; ii) where BMJ has agreed a CC-BY licence shall apply, and/or iii) in accordance with the terms applicable for US Federal Government officers or employees acting as part of their official duties; on a worldwide, perpetual, irrevocable, royalty-free basis to BMJ Publishing Group Ltd ("BMJ") its licensees and where the relevant Journal is co-owned by BMJ to the co-owners of the Journal, to publish the Work in this journal and any other BMJ products and to exploit all rights, as set out in our [licence](#).

The Submitting Author accepts and understands that any supply made under these terms is made by BMJ to the Submitting Author unless you are acting as an employee on behalf of your employer or a postgraduate student of an affiliated institution which is paying any applicable article publishing charge ("APC") for Open Access articles. Where the Submitting Author wishes to make the Work available on an Open Access basis (and intends to pay the relevant APC), the terms of reuse of such Open Access shall be governed by a Creative Commons licence – details of these licences and which [Creative Commons](#) licence will apply to this Work are set out in our licence referred to above.

Other than as permitted in any relevant BMJ Author's Self Archiving Policies, I confirm this Work has not been accepted for publication elsewhere, is not being considered for publication elsewhere and does not duplicate material already published. I confirm all authors consent to publication of this Work and authorise the granting of this licence.



## Disability discrimination and wellbeing: A prospective analysis

Ruth A. Hackett<sup>1,2\*</sup>, Andrew Steptoe<sup>2</sup>, Raymond P. Lang<sup>3</sup>, and Sarah E. Jackson<sup>2</sup>

<sup>1</sup> Health Psychology Section, Department of Psychology, Institute of Psychiatry, Psychology and Neuroscience, Guy's Hospital, King's College London, London, UK

<sup>2</sup> Department of Behavioural Science and Health, University College London, London, UK

<sup>3</sup> Leonard Cheshire Research Centre, Department of Epidemiology and Public Health, University College London, London, UK

**\*Corresponding author:** Ruth A. Hackett, PhD. Health Psychology Section, Department of Psychology, Institute of Psychiatry, Psychology and Neuroscience, Guy's Hospital, King's College London, London, UK

Email: [ruth.hackett@kcl.ac.uk](mailto:ruth.hackett@kcl.ac.uk) ORCID: <https://orcid.org/0000-0002-5428-2950>

**Co-author emails:** [a.steptoe@ucl.ac.uk](mailto:a.steptoe@ucl.ac.uk) [r.lang@ucl.ac.uk](mailto:r.lang@ucl.ac.uk) [s.e.jackson@ucl.ac.uk](mailto:s.e.jackson@ucl.ac.uk)

**Word count:** 4689

**Number of tables:** 5

1  
2  
3 **26 Abstract**  
4

5 **27 Objectives:** Disability discrimination is linked with poorer wellbeing cross-sectionally. The  
6  
7  
8 **28** aim of this study was to explore prospective associations between disability discrimination and  
9  
10 wellbeing.  
11

12 **30 Design:** Prospective cohort study  
13

14 **31 Setting:** The United Kingdom Household Longitudinal Study  
15

16 **32 Participants:** Data were from 871 individuals with a self-reported physical, cognitive or  
17  
18  
19  
20 sensory disability.  
21

22 **34 Primary outcome measures:** Depression was assessed in 2009/10. Psychological distress,  
23  
24  
25  
26  
27  
28 mental functioning, life satisfaction and self-rated health were assessed in 2009/10 and  
29  
30  
31  
32  
33  
34  
35  
36  
37 2013/14.  
38

39 **37 Results:** Data were analysed using linear and logistic regression with adjustment for age, sex,  
40  
41  
42  
43  
44  
45  
46  
47  
48  
49  
50  
51  
52  
53  
54  
55  
56  
57  
58  
59  
60 household income, education, ethnicity and impairment category. Perceived disability  
discrimination was reported by 117 (13.4%) participants. Cross-sectionally, discrimination was  
associated with depression (Odds ratio (OR) = 5.40, 95% Confidence Interval (CI) 3.25; 8.97)  
fair/poor self-rated health (OR=2.05; 95% CI 1.19; 3.51), greater psychological distress ( $B =$   
3.28, 95% CI 2.41; 4.14), poorer mental functioning ( $B = -7.35$ ; 95% CI -9.70; -5.02) and life  
satisfaction ( $B = -1.27$ , 95% CI -1.66; -0.87). Prospectively, discrimination was associated with  
increased psychological distress ( $B = 2.88$ , 95% CI 1.39; 4.36) and poorer mental functioning  
( $B = -5.12$ ; 95% CI -8.91; -1.34), adjusting for baseline scores.

50 **46 Conclusions:** Perceived disability-related discrimination is linked with poorer wellbeing.  
51  
52  
53  
54  
55  
56  
57  
58  
59  
60 These findings underscore the need for interventions to combat disability discrimination.

56 **49 Key words:** disability, discrimination; prejudice; stigma; mental health; wellbeing  
57  
58  
59  
60

## 51 Article Summary

- 52 • The use of the prospective United Kingdom Household Longitudinal Study allowed  
53 use to examine wellbeing over a 4 year period.
- 54 • The disability discrimination measure took into account several kinds of  
55 discriminatory behaviour and included multiple settings where perceived disability  
56 discrimination could be encountered.
- 57 • Our findings are based on perceptions of disability discrimination rather than  
58 objective encounters with disability discrimination.
- 59 • Disability discrimination was only assessed at one point in time, meaning our measure  
60 does not necessarily reflect pervasive discrimination.

61  
62  
63  
64  
65 **Funding:** This work was supported by the Economic and Social Research Council  
66 (<https://esrc.ukri.org/>), grant number ES/R005990/1. The funders had no role in study design,  
67 data collection and analysis, decision to publish, or preparation of the manuscript.

68 **Competing interests:** The authors declare that they have no conflict of interest.

69 **Data sharing:** The UKHLS datasets analysed during the current study are freely available in  
70 the UK Data Service repository <https://ukdataservice.ac.uk/>

## 76 **Introduction**

77 "Disability" is an umbrella term for long-term impairments, activity limitations and  
78 participation restrictions, experienced by an individual with a health condition in interaction  
79 with their environment[1–3]. In the UK, the prevalence of self-reported disability is rising, with  
80 21% of the population reporting a disability in 2017-2018, an increase from 18% in 2007-  
81 2008[4]. This increase is likely driven by population ageing. The majority of disabled people  
82 report experiencing difficulties in everyday life. For example, disabled people in Britain have  
83 lower educational attainment, are less likely to be employed and are more likely to live in  
84 poverty than non-disabled adults[5], with knock on effects regarding access to health and other  
85 services[6].

86 These practical difficulties experienced by a person with a long-term impairment may  
87 be aggravated by and interact with discrimination in the person's environment. Disability  
88 discrimination has been defined as unwanted, exploitative or abusive conduct against disabled  
89 people which violates their dignity and security or creates an intimidating or offensive  
90 environment[7]. Although disability is a protected characteristic under equality legislation[1],  
91 disability discrimination is perceived to be common. In a 2015 population survey of 27,718  
92 adults from 26 European countries, 50% of participants reported disability discrimination to be  
93 widespread, a 4% increase from 2012 data. However, the reasons behind this increase are  
94 unclear due to the cross-sectional nature of the Eurobarometer data[8].

95 Disability discrimination can happen in a variety of settings including on the street, in  
96 the workplace and in public venues such as shops or pubs[9]. Recent British data suggests that  
97 disabled people are more likely than non-disabled people to report feeling unsafe when walking  
98 alone and to worry about physical attack and theft [10,11]. Disability is the second most  
99 common motivator for hate crime incidents, after race in England and Wales[12]. In the

1  
2  
3 100 workplace, several studies suggest that a greater proportion of disabled than non-disabled  
4  
5 101 individuals report experiences of discrimination [7,13].  
6  
7

8 102 A growing body of research has investigated discrimination as a determinant of  
9  
10 103 wellbeing[14–16]. Meta-analyses have linked perceived discrimination with depression and  
11  
12 104 psychological distress and with poorer life satisfaction and self-rated health[14–16]. However,  
13  
14 105 disability discrimination was not assessed in two of these meta-analyses and the majority of  
15  
16 106 previous working has focused on racism [14,15]. In the most recent pooled analysis of  
17  
18 107 328 studies, of which only 8 studies concerned physical illness discrimination and disability  
19  
20 108 discrimination[16], the combined category of physical illness/disability discrimination was  
21  
22 109 associated with greater psychological distress and lower self-esteem.  
23  
24  
25

26 110 Several cross-sectional studies have assessed perceived disability discrimination alone  
27  
28 111 in relation to wellbeing outcomes. One study of 229 individuals with an intellectual disability  
29  
30 112 in England found that self-reported stigma was associated with a greater number of depression  
31  
32 113 and anxiety symptoms[17]. Two analyses of the Australian Survey of Disability, Ageing and  
33  
34 114 Carers (n=9655 and n=6183, respectively) linked disability discrimination with greater  
35  
36 115 psychological distress[18,19]. This association was similarly observed in a Swedish general  
37  
38 116 population survey[20]. Research has also linked perceived disability discrimination with lower  
39  
40 117 life satisfaction in Canadian adolescents[21], Korean women with severe disabilities[22] and  
41  
42 118 Israeli nationals with physical disabilities[23]. Perceived disability discrimination has been  
43  
44 119 associated with poorer self-rated health cross-sectionally in four studies[19,24–26] including a  
45  
46 120 general population analysis of 52,458 individuals, from the European Social Survey[25].  
47  
48  
49

50  
51 121 Cross-sectional correlations are difficult to interpret: perception of discrimination may  
52  
53 122 result in emotional distress, but it is also possible that emotional distress leads to alterations in  
54  
55 123 how people interpret social interactions with others. To date, only one study has assessed  
56  
57 124 prospective associations between perceived disability discrimination and wellbeing [27]. In an  
58  
59  
60

1  
2  
3 125 analysis of older adults ( $\geq 50$  years) participating in the US-based Health and Retirement Study  
4  
5 126 (HRS), perceived disability discrimination was associated with poorer life satisfaction, self-  
6  
7 127 rated health, and greater loneliness over four-year follow-up.  
8  
9

10 128 Overall, previous research has been dominated by cross-sectional studies, precluding  
11  
12 129 the assessment of the temporal relationship between perceived disability discrimination and  
13  
14 130 wellbeing outcomes. No longitudinal studies have compared people with a disability who do  
15  
16 131 or do not report discrimination and wellbeing outcomes. To address these limitations, this study  
17  
18 132 aimed to investigate cross-sectional and prospective associations between perceived disability  
19  
20 133 discrimination and wellbeing in a UK population cohort.  
21  
22  
23  
24 134

## 25 26 135 **Methods**

### 27 28 136 **Study population**

29  
30 137 This study uses data from Understanding Society: The UK Household Longitudinal Study  
31  
32 138 (UKHLS)[28]. The overarching purpose of UKHLS is to provide high quality longitudinal  
33  
34 139 data about the health, work, education, income, family, and social life of the UK population  
35  
36 140 [29]. Data collection began in 2009/10 (wave 1) with follow-ups annually. The current study  
37  
38 141 uses data from waves 1 (2009/10) and 5 (2013/14). These data were collected through face-to-  
39  
40 142 face interview via computer aided personal interview and self-completion paper questionnaires  
41  
42 143 and from wave 3 via computer administered self-interview. The UKHLS comprises of a  
43  
44 144 representative general population probability sample of UK households, in addition to an ethnic  
45  
46 145 minority boost sample[29,30]. The general population sample is based on proportionality  
47  
48 146 stratified clustered samples of residential addresses in England, Scotland and Wales. In  
49  
50 147 Northern Ireland, an unclustered systematic random sample of domestic addresses was  
51  
52 148 selected. The ethnic minority boost was selected from high concentration ethnic minority areas,  
53  
54 149 where 80% of the United Kingdom's five major ethnic minorities live [29].  
55  
56  
57  
58  
59  
60

1  
2  
3 150 Our data come from the ‘extra 5 minutes sample’ of over 8,000 participants who had  
4  
5 151 an additional 5 minutes of questions on issues pertinent to ethnicity research including  
6  
7 152 discrimination. This sample comprises of mostly ethnic minorities ( $n = 6722$ ) who were drawn  
8  
9  
10 153 from the ethnic minority boost along with a comparison group of white participants ( $n =$   
11  
12 154  $1428$ )[30]. We restricted our sample to those who responded to the disability discrimination  
13  
14 155 questions ( $n = 4788$ ) with a self-reported disability ( $n = 871$ ). Self-reported disability was based  
15  
16 156 on a positive response the question “*Do you have any health problems or disabilities which*  
17  
18 157 *mean you have substantial difficulties with any of the following areas of your life*” across any  
19  
20 158 of the 12 types of difficulty assessed. These included issues with manual dexterity and mobility,  
21  
22 159 problems with memory or the ability to concentrate, difficulties with learning and  
23  
24 160 understanding, as well as hearing and sight impairments. The response rates for the UKHLS  
25  
26 161 general population sample and the ethnic minority boost at Wave 1 were 81.8% and 72.4%,  
27  
28 162 respectively [30]. The response rate for the “extra 5-min sample” was 42.5%. At wave 5 there  
29  
30 163 was loss to follow-up ( $n=431$ ), leaving a follow-up sample size of 440 participants. Our  
31  
32 164 definition of disability did not include mental health-related impairments. Ethical approval for  
33  
34 165 UKHLS was obtained from the University of Essex Ethics Committee. All participants  
35  
36 166 provided fully informed consent.  
37  
38  
39  
40  
41  
42  
43  
44

### 168 **Perceived disability discrimination**

46  
47 169 To assess discrimination, participants were asked whether in the past 12 months they (a) felt  
48  
49 170 unsafe, (b) avoided going to or being in, (c) had been insulted, called names, threatened or  
50  
51 171 shouted at, or (d) had been physically attacked, in seven different settings: 1) At  
52  
53 172 school/college/work, 2) On public transport, 3) At or around bus or train stations, 4) In a taxi,  
54  
55 173 5) Public buildings such as shopping centres or pubs, 6) Outside on the street, in parks or other  
56  
57 174 public places, or 7) At home. If they answered yes to any one of these questions, a follow-up  
58  
59  
60

1  
2  
3 175 question asked them to choose a reason from a list of categories including disability, sex and  
4  
5 176 ethnicity among others. It was possible to choose multiple settings and attributions for the  
6  
7  
8 177 perceived discrimination. Those who attributed any experience of discrimination to disability  
9  
10 178 are treated as cases of perceived disability discrimination.

11  
12 179

### 14 180 **Outcome variables**

16  
17 181 Self-reported doctor-diagnosed clinical depression was measured at wave 1 (2009/10) with  
18  
19 182 responses coded as yes/no. Depression was not analysed longitudinally due to a lack of incident  
20  
21 183 cases. All other outcomes were assessed at waves 1 (2009/10) and 5 (2013/14). Psychological  
22  
23 184 distress was measured using the General Health Questionnaire (GHQ)-12[31], which involved  
24  
25 185 ratings of 12 statements including whether the individual had “*Been able to enjoy your normal*  
26  
27 186 *day to day activities*” or whether they “*Felt constantly under strain*” with response options of  
28  
29 187 0=“no” and 1=“yes”. Total scores range from 0 (least distressed) to 12 (most distressed). The  
30  
31 188 12-item short-form health survey (SF-12) mental component summary score was used to  
32  
33 189 measure limitations caused by emotional, mental health and social functioning issues[32].  
34  
35 190 Items included ratings of feelings experienced over the past 4 weeks such as “*Have you felt*  
36  
37 191 *downhearted or blue?*” or “*Accomplished less than you would like*”. Overall scores were  
38  
39 192 derived using standard methods ranging from 0 (low functioning) to 100 (high functioning)  
40  
41 193 [33]. Life satisfaction was assessed using one item asking participants how satisfied they were  
42  
43 194 with their “life overall”, with scores ranging from 1 (completely dissatisfied) to 7 (completely  
44  
45 195 satisfied). Self-rated health was assessed using a single item: “*Would you say your health*  
46  
47 196 *is...poor/fair/good/very good/excellent?*” In keeping with previous investigations [34,35] self-  
48  
49 197 rated health was dichotomised with 0 being “good/very good/excellent” and 1 meaning  
50  
51 198 “poor/fair”.  
52  
53  
54  
55  
56  
57  
58  
59  
60



## 200 **Covariates**

201 A number of covariates (assessed at wave 1) that are likely relevant to perceived disability  
202 discrimination and wellbeing were selected a priori for inclusion in our analyses. Age in years  
203 was entered as a continuous variable, as there may be age differences in reports of  
204 discrimination [36] and in wellbeing outcomes [37]. Sex was included as a binary variable  
205 (male/female) based on previous literature demonstrating sex differences in the impact of  
206 discrimination on health [38]. Income and education were included as covariates as there may  
207 be socio-economic differences in the perception of discrimination and in wellbeing outcomes  
208 [36,39]. Equivalised monthly household income was calculated by dividing total household net  
209 income by the modified Organization for Economic Cooperation and Development (OECD)  
210 equivalence scale to adjust for the effects of household size and composition[40]. Income was  
211 entered as a continuous variable in our models. Education was included as a 3-level categorical  
212 variable: 1 “university degree”, 2 “high school qualification” and 3 “no qualification”. As our  
213 sample was ethnically diverse, we included ethnicity as a 4-level variable with 1 being “white”  
214 including those of white British, white Irish and any other white background, 2 being “south  
215 Asian” including Indian, Pakistani and Bangladeshi individuals, 3 being “black” including  
216 black African and black Caribbean participants and 4 being “other” including individuals from  
217 Chinese and mixed backgrounds. There were 4 categories of impairment measured in the study:  
218 “physical” disability which included difficulties with manual dexterity and mobility;  
219 “cognitive” disability including problems with memory or the ability to concentrate, learn and  
220 understand; “sensory” disability including hearing (apart from using a standard hearing aid)  
221 and sight impairments (apart from wearing standard glasses) and “other” which encompassed  
222 reports of unspecified disability not captured in the other categories.

223

## 224 **Statistical analyses**

1  
2  
3 225 We compared the characteristics of those who did and those who did not report disability  
4  
5 226 discrimination at wave 1 using Chi-squared tests for categorical variables and independent  
6  
7 227 samples t-tests for continuous variables. Associations between perceived disability  
8  
9 228 discrimination and the various wellbeing measures were assessed using linear regression for  
10  
11 229 continuous outcomes and logistic regression for categorical outcomes. For cross-sectional  
12  
13 230 analyses, depression, psychological distress (GHQ-12), SF-12 mental component score, life  
14  
15 231 satisfaction and self-rated health at wave 1 (2009/10) were the outcome variables. For  
16  
17 232 prospective analyses, psychological distress (GHQ-12), SF-12 mental component score, life  
18  
19 233 satisfaction and self-rated health at wave 5 (2013/14) were the outcomes. Age, sex, household  
20  
21 234 income, education, ethnicity and disability type at wave 1 were controlled for in all analyses.  
22  
23 235 Baseline (wave 1) scores/status on the relevant wellbeing variable was included as an additional  
24  
25 236 covariate in prospective analyses. Only those with complete case information at wave 1  
26  
27 237 ( $n=871$ ) and wave 5 ( $n=440$ ) were included in the analyses. Results from linear regression  
28  
29 238 analyses are presented as unstandardized B and 95% confidence intervals (95% CI). Results  
30  
31 239 from logistic regression analyses are presented as odds ratios (ORs) and 95% CI. All analyses  
32  
33 240 were unweighted and conducted using SPSS v.24.  
34  
35  
36  
37  
38  
39  
40  
41

#### 42 242 **Sensitivity analyses**

43  
44 243 We carried out three sensitivity analyses. In our first, we assessed whether those who were lost  
45  
46 244 to follow-up ( $n = 431$ ) differed from those who provided data at both waves ( $n = 440$ ). We  
47  
48 245 tested whether this impacted the results by conducting the cross-sectional analyses (wave 1)  
49  
50 246 including only those who provided follow-up data at wave 5. We carried out our second  
51  
52 247 sensitivity analysis to test the possibility that one of the four types discriminatory behaviour  
53  
54 248 contributing to the measure of perceived disability discrimination (i.e. feeling unsafe, avoiding  
55  
56 249 somewhere, being insulted or being physically attacked) was driving the results. We tested this  
57  
58  
59  
60

1  
2  
3 250 cross-sectionally and prospectively by repeating our analyses removing each type of  
4  
5 251 discriminatory behaviour in turn. In our third sensitivity analysis, we tested whether the  
6  
7  
8 252 prospective results from our complete cases analysis at wave 5 (n=440) were similar when  
9  
10 253 missing outcome information was imputed for those participants lost to follow-up (n=431).

11  
12 254

13  
14  
15 255

## 16 17 256 **Results**

18  
19 257 A total of 871 participants were included in the study and of these 117 (13.4%) reported  
20  
21 258 perceived disability discrimination. Disability discrimination was the mostly commonly  
22  
23  
24 259 reported form of discrimination in the sample, followed by age discrimination (4.3%), sex  
25  
26 260 discrimination (3.9%), ethnicity discrimination (3.8%), religious discrimination (2.2%) and  
27  
28 261 discrimination on the basis of sexual orientation (0.5%). Of the categories of disability  
29  
30 262 discrimination assessed, the most commonly reported was feeling unsafe (86.1%; 95% CI  
31  
32 263 79.48-92.74), followed by avoiding somewhere (72.8%; 95% CI 64.08-81.55), being insulted  
33  
34 264 (23.5%; 95% CI 14.33-32.73) and being physically attacked (2.8%; 95% CI 0.04-5.98). The  
35  
36  
37 265 most common settings in which disability discrimination was reported were on the street  
38  
39 266 (77.8%; 95% CI 70.13-85.42), in public buildings such as shops or pubs (59.8%; 95% CI 50.81-  
40  
41 267 68.84), on public transport (51.3%; 95% CI 42.09-60.47) and at or around bus or train stations  
42  
43 268 (40.2%; 95% CI 31.16-49.19). A quarter of participants reported experiencing disability  
44  
45 269 discrimination at home (25%; 95% CI 17.61-33.67). Perceived disability discrimination was  
46  
47 270 less frequently reported in school or workplace settings (12.8%; 95% CI 6.67-18.97) or in taxis  
48  
49 271 (12%; 95% CI 6-17.93). The prevalence of the various types of perceived disability  
50  
51 272 discrimination and the settings in which the discrimination occurred for different types of  
52  
53  
54 273 disability can be found in Supplementary Table 1. There were no statistically significant  
55  
56  
57  
58  
59  
60

1  
2  
3 274 differences between people with different types of disability in discrimination type or  
4  
5 275 discrimination setting.

6  
7  
8 276 The baseline characteristics of the sample are displayed in Table 1. The group who  
9  
10 277 reported disability discrimination were younger on average ( $48.29 \pm 14.89$  years) than those  
11  
12 278 who did not report discrimination ( $53.42 \pm 16.56$  years). They were more likely to be white  
13  
14 279 (27.4% vs. 20.3%) and to be better educated than those who did not report discrimination, with  
15  
16  
17 280 a greater proportion holding university degrees (28.2% vs 22.7%). Physical disability was most  
18  
19 281 common in those who did not perceive discrimination (46.6%), whereas other unspecified  
20  
21 282 disabilities (65%) were most frequently reported by those who perceived discrimination.  
22  
23

24 283

#### 25 26 284 **Cross-sectional associations between perceived disability discrimination and wellbeing**

27  
28 285 Our findings suggest that individuals who perceived disability discrimination were  
29  
30  
31 286 significantly more likely to report a diagnosis of clinical depression (OR=5.40; 95% CI 3.25;  
32  
33 287 8.97,  $p < 0.001$ ) and were more likely to rate their health as fair/poor (OR=2.05; 95% CI 1.19;  
34  
35 288 3.51,  $p = 0.009$ ) than those who did not perceive disability discrimination, independent of  
36  
37  
38 289 covariates (first panel Table 2). Those who reported discrimination also had significantly  
39  
40 290 higher levels of psychological distress ( $B = 3.28$ , 95% CI 2.41; 4.14,  $p < 0.001$ ), poorer mental  
41  
42 291 functioning on the SF-12 ( $B = -7.35$ ; 95% CI -9.70; -5.02,  $p < 0.001$ ) and lower life satisfaction  
43  
44 292 ( $B = -1.27$ , 95% CI -1.66; -0.87,  $p < 0.001$ ), than those who did not report discrimination  
45  
46

47 293

#### 48 49 294 **Prospective associations between perceived disability discrimination and wellbeing**

50  
51 295 In prospective analyses (second panel Table 2), those who reported perceived disability  
52  
53 296 discrimination at wave 1 had higher levels of psychological distress 4 years later at wave 5 than  
54  
55  
56 297 those who did not report discrimination, independent of covariates and baseline psychological  
57  
58 298 distress ( $B = 2.88$ , 95% CI 1.39; 4.36,  $p < 0.001$ ). We detected a prospective association  
59  
60

299 between perceived disability discrimination at wave 1 and poorer SF-12 mental functioning at  
300 wave 5 ( $B = -5.12$ ; 95% CI  $-8.91$ ;  $-1.34$ ,  $p = 0.008$ ). Those who reported disability  
301 discrimination at wave 1 had slightly lower life satisfaction (means = 4.14 vs 4.67) and a greater  
302 proportion rated their health as fair/poor (67.3% vs 62.1%) than those who did not report  
303 discrimination at follow-up (wave 5). However, these differences did not reach statistical  
304 significance.

305

### 306 **Sensitivity analyses**

307 In the first sensitivity analysis (Table 3), cross-sectional findings for those who provided  
308 complete data at wave 5 were similar to the full-sample at wave 1. The demographic  
309 characteristics of those lost to follow-up were similar to those of complete cases (Table 4).  
310 Only education differed significantly between the groups, with those who provided complete  
311 data at wave 5 more likely to hold a degree (27.0%) than those lost to follow-up (19.7%).

312 In the second sensitivity analysis, removing each of the discriminatory behaviours from  
313 the measure of discrimination in turn did not alter the cross-sectional results (Table 5).  
314 Prospectively, the association between perceived disability discrimination and increased  
315 psychological distress remained the same regardless of the type of discriminatory behaviour  
316 removed from the measure. For SF-12 mental functioning, the association was fairly robust to  
317 the type of discriminatory behaviour, but was slightly attenuated when “feeling unsafe” was  
318 removed from the discrimination variable ( $p = 0.058$ ). Again, no significant prospective  
319 associations were detected for life satisfaction and self-rated health.

320 In our final sensitivity analysis (Supplementary Table 2), we repeated the prospective  
321 analyses with imputation for missing outcome information of participants lost to follow-up  
322 ( $n=431$ ). The prospective relationship between perceived disability discrimination and poor  
323 SF-12 mental functioning remained ( $p = 0.034$ ). However, there was no longer a statistically

1  
2  
3 324 significant prospective association between reported discrimination and psychological distress  
4  
5 325 ( $p = 0.128$ ).  
6  
7  
8 326

9  
10 327 **Discussion**

11  
12 328 In a sample of UK-based participants with self-reported disability, perceived discrimination  
13  
14 329 was associated with higher prevalence of depression, greater psychological distress, and poorer  
15  
16 330 mental functioning, life satisfaction and self-rated health. Prospectively, disability  
17  
18 331 discrimination was associated with increased psychological distress and worse mental  
19  
20 332 functioning four-years later. Our results were robust to adjustment for a range of covariates and  
21  
22 333 were not driven by any specific kind of discriminatory behaviour. No significant prospective  
23  
24 334 relationships with life satisfaction and self-rated health were observed.  
25  
26  
27

28 335 Previous literature has been dominated by cross-sectional studies. To our knowledge,  
29  
30 336 only one previous study has investigated the prospective association between disability  
31  
32 337 discrimination and wellbeing outcomes. In this analysis of US adults from the HRS cohort,  
33  
34 338 perceived disability discrimination was associated with poorer life satisfaction and self-rated  
35  
36 339 health over four year follow-up [27]. In the current study we observed poorer mental  
37  
38 340 functioning and greater psychological distress four years later in those who reported disability  
39  
40 341 discrimination, taking into account baseline scores on these variables. We failed to detect a  
41  
42 342 significant association between perceived discrimination and life satisfaction or self-rated  
43  
44 343 health at follow-up. Although on average, those who perceived disability discrimination in our  
45  
46 344 sample had poorer life satisfaction and were more likely to rate their health as fair/poor at  
47  
48 345 follow-up than those who did not perceive discrimination, these differences did not reach  
49  
50 346 statistical significance. One reason for the divergence in findings between our study and the  
51  
52 347 HRS analysis [27] may be study design. We limited our analyses to those with self-reported  
53  
54 348 disability, whereas in the HRS study associations between wellbeing and disability  
55  
56  
57  
58  
59  
60

1  
2  
3 349 discrimination were assessed across the entire sample. Our analysis offers more precision in  
4  
5 350 the assessment of the relationship between disability discrimination and wellbeing outcomes,  
6  
7  
8 351 by directly comparing people with disability who did and did not perceive discrimination.  
9  
10 352 Another possibility for these null findings may be that significant associations between  
11  
12 353 discrimination and life satisfaction and self-rated health do not become apparent until older  
13  
14 354 adulthood, perhaps allowing for repeated exposures to disability discrimination. However, this  
15  
16  
17 355 assertion remains to be tested. Another potential explanation is that the impact of ongoing  
18  
19 356 disability discrimination on life satisfaction and self-rated health in our sample had already  
20  
21 357 become apparent at the time of the baseline survey, limiting the scope for further decline.  
22  
23

24 358 Our study adds to the cross-sectional literature linking perceived disability  
25  
26 359 discrimination and poorer wellbeing outcomes by demonstrating associations in a community  
27  
28 360 sample of disabled people living in the UK. Our results extend the findings of an earlier study  
29  
30 361 linking stigma and depression in those with intellectual disability[17], by establishing this  
31  
32 362 relationship in a sample with a broader range of disability. In keeping with previous studies,  
33  
34 363 we observed greater psychological distress[18–20] and poorer life satisfaction[21–23,27] in  
35  
36 364 those who reported disability discrimination. Our study adds to this existing evidence by  
37  
38 365 demonstrating this link in a UK-based sample for the first time. Similar to earlier work from  
39  
40 366 Australian, European and North American samples[19,24,27,41], we observed a relationship  
41  
42 367 between perceived disability discrimination and poorer self-rated health. Cross-sectional  
43  
44 368 studies cannot determine whether perceived disability discrimination predicts poor mental  
45  
46 369 wellbeing, or whether perceptions of discrimination are an indicator of psychological distress.  
47  
48 370 Our prospective findings therefore add to the field in establishing that perceived disability  
49  
50 371 discrimination predicts psychological distress and poorer mental functioning, net of baseline  
51  
52 372 associations, so has negative implications for future wellbeing.  
53  
54  
55  
56  
57  
58  
59  
60

1  
2  
3 373 This is an observational study and longitudinal analyses do not necessarily imply  
4  
5 374 causality. There could be unmeasured factors responsible for the associations that emerged.  
6  
7  
8 375 Nevertheless, with regard to the pathways linking perceived disability discrimination and  
9  
10 376 wellbeing, there are several possibilities that could explain our results. One mechanism could  
11  
12 377 be that perceptions of disability discrimination in healthcare settings serve to impede access to  
13  
14 378 health services. An analysis of HRS found that reports of frequent discrimination in healthcare  
15  
16 379 settings were predictive of new or worsened disability over four year follow-up[42].  
17  
18 380 Quantitative[38,43] and qualitative[44] evidence suggests that those who perceive disability  
19  
20 381 discrimination are less likely to seek healthcare. However, there may be sex differences in this  
21  
22 382 association, with a Swedish study only detecting a relationship between disability  
23  
24 383 discrimination and healthcare avoidance in women[38]. However, no interaction between sex  
25  
26 384 and perceived discrimination was detected in the current study (data not shown).

27  
28  
29  
30 385 Poor health behaviours are another potential mechanism linking disability  
31  
32 386 discrimination and poorer wellbeing. For example, perceived disability discrimination has been  
33  
34 387 linked with worse sleep quality in the HRS, with psychological distress acting as a full mediator  
35  
36 388 of this association[45]. It is possible that disabled people could engage in negative health  
37  
38 389 behaviours as a means of coping with the psychological impact of discrimination. In a study of  
39  
40 390 304 individuals with disability, perceived disability discrimination was positively associated  
41  
42 391 with illicit drug use[46]. Eating may offer a source of comfort in the face of discrimination[47].  
43  
44 392 A US study of over 5000 individuals, observed a link between physical disability  
45  
46 393 discrimination and overeating[48].

47  
48  
49  
50 394 Another possibility is that perceived disability discrimination and wellbeing are linked  
51  
52 395 through disturbed stress-related biological processes. In line with the theory of allostatic load,  
53  
54 396 perceived chronic discrimination causing frequent activation of the stress response system,  
55  
56 397 could over time result in disturbances across multiple biological systems[49]. Systematic  
57  
58  
59  
60



1  
2  
3 398 reviews and meta-analyses, which have predominately focused on racism, suggest that  
4  
5 399 discrimination is linked with heightened cardiovascular stress reactivity[14,50], while race[50–  
6  
7 400 52] and weight discrimination[53] have been linked with alterations in cortisol. To our  
8  
9 401 knowledge, no study has investigated associations between perceived disability discrimination  
10  
11 402 and changes in cardiovascular or neuroendocrine activity. In the HRS cohort, perceived  
12  
13 403 disability discrimination was linked with raised c-reactive protein levels cross-sectionally[54].  
14  
15 404 Heightened inflammation is thought to be predictive of poorer mental wellbeing[55], offering  
16  
17 405 a plausible pathway between perceived disability discrimination and later psychological  
18  
19 406 distress and poorer mental functioning seen in the present study. Further work is required to  
20  
21 407 confirm this assertion, particularly as the HRS analysis was not limited to those with a  
22  
23 408 confirmed disability.

24  
25 409 Our study had several strengths. The use of the UKHLS cohort allowed us to examine  
26  
27 410 wellbeing over a 4-year period across a wide age range (17 – 96 years), while adjusting  
28  
29 411 statistically for factors that could confound associations. The discrimination measure took into  
30  
31 412 account several kinds of discriminatory behaviour and included multiple settings where  
32  
33 413 perceived disability discrimination could be encountered.

34  
35 414 However, the study was not without limitations. We lost a considerable number of  
36  
37 415 participants at follow-up, and although the cross-sectional findings did not differ between those  
38  
39 416 who provided data at both waves and those lost to follow-up (sensitivity analysis 1), we cannot  
40  
41 417 be sure that selection bias due to low retention did not impact our findings longitudinally due  
42  
43 418 to the extent of missing data. Indeed, in imputed analyses (sensitivity analysis 3) the association  
44  
45 419 between disability discrimination and wellbeing held for SF-12 mental functioning but not for  
46  
47 420 psychological distress. Our findings are based on perceptions of disability discrimination rather  
48  
49 421 than objective encounters with disability discrimination. It is possible that perceiving oneself  
50  
51 422 as a target for discrimination and objective encounters with discrimination could have differing  
52  
53  
54  
55  
56  
57  
58  
59  
60

1  
2  
3 423 consequences for wellbeing. Indeed, earlier work in a sample with significant health  
4  
5 424 limitations, indicates that individuals with poorer mental wellbeing may be more likely to  
6  
7 425 perceive stigma[56]. Future studies assessing reciprocal prospective associations between  
8  
9 426 perceived disability discrimination and wellbeing could help to clarify this issue. Our  
10  
11 427 discrimination measure was based on self-reports of experiences during the past 12 months and  
12  
13 428 was therefore subject to recall bias. Further, this measure was not specific to disability  
14  
15 429 discrimination. The fact that participants were able to attribute multiple reasons for their  
16  
17 430 experience of discrimination, could have helped avoid priming or bias. Other tools specifically  
18  
19 431 designed to assess disability discrimination could have garnered different results. Our sample  
20  
21 432 was ethnically diverse, and we took ethnicity into account in our models. Although disability  
22  
23 433 discrimination was the most commonly reported form of discrimination in this sample,  
24  
25 434 perceived discrimination on the basis of ethnicity may also have been relevant for this sample.  
26  
27 435 Further work is required to understand how disability discrimination interacts with ethnicity  
28  
29 436 discrimination, as well as other types of discrimination to influence wellbeing. Disability  
30  
31 437 discrimination was only assessed at one point in time, meaning our measure does not  
32  
33 438 necessarily reflect pervasive discrimination. However, other work in UKHLS suggests that  
34  
35 439 perceived disability discrimination is still frequently reported at later stages of data collection  
36  
37 440 [57]. Future research is required to determine whether perceptions of disability discrimination  
38  
39 441 are persistent or alter over time. We operationalised perceived discrimination as a simple binary  
40  
41 442 variable and had no information on the frequency of encounters with discrimination over time.  
42  
43 443 Therefore, the potential dose response relationship between the frequency of discrimination  
44  
45 444 and wellbeing remains to be elucidated. Our study included participants with physical,  
46  
47 445 cognitive and sensory disabilities. However, our sample is unlikely to have captured those with  
48  
49 446 severe cognitive impairments due to the demands of survey participation. For a large  
50  
51 447 proportion (37%) their disability type was unknown and classified as “other”, limiting our  
52  
53  
54  
55  
56  
57  
58  
59  
60

1  
2  
3 448 understanding. While, no one with a mental health-related disability was included in the  
4  
5 449 physical, cognitive and sensory disabilities categories, we cannot be certain that the “other”  
6  
7  
8 450 category did not include participants with mental health-related impairments.  
9

10 451 Overall, our study adds to the literature by demonstrating prospective associations  
11  
12 452 between perceived disability discrimination and wellbeing outcomes. These findings  
13  
14 453 emphasise the need to reduce the prevalence of disability discrimination, with the benefit of  
15  
16 454 promoting equality as well as possible advantages for wellbeing too. Though complete  
17  
18 455 elimination of disability discrimination is likely to be difficult, recognition of disability  
19  
20 456 discrimination as an issue is the first step in preventing its occurrence. Addressing this could  
21  
22 457 involve raising awareness through the use of campaigns. The Public Sector Equality Duty in  
23  
24 458 the UK requires public bodies to have due regard to the need to eliminate discrimination and  
25  
26 459 this awareness raising should begin early in life[7]. However, it is estimated that less than 40%  
27  
28 460 of English primary schools have a disability equality scheme in place, with race and gender  
29  
30 461 equality more often prioritised over disability equality[58]. Therefore, further effort on this  
31  
32 462 issue is required[7], particularly as disability discrimination is perceived to be more widespread  
33  
34 463 than gender discrimination in Europe[8].  
35  
36  
37  
38  
39

40 464 As well as macro-level awareness raising, on an individual basis the negative impact of  
41  
42 465 perceived disability discrimination on wellbeing may be buffered through the use of social  
43  
44 466 support. In two cross-sectional studies of US adults with varied disability diagnoses, those with  
45  
46 467 more friends reported greater life satisfaction and these friendships attenuated the link between  
47  
48 468 functional impairment and poorer quality of life[59]. In an Israeli study, perceived disability  
49  
50 469 discrimination and poorer life satisfaction were only linked in those with low and moderate  
51  
52 470 levels of social support, with no association in those with greater levels of support[60]. Further  
53  
54 471 research disability discrimination is necessary to develop awareness campaigns and to  
55  
56 472 appropriately target individual-level interventions.  
57  
58  
59  
60

1  
2  
3 473 **Author contributions:** RAH conducted the statistical analysis and wrote the manuscript. AS  
4  
5 474 edited and reviewed the manuscript. RPL edited and reviewed the manuscript. SJ provided  
6  
7 475 scientific overview, edited and reviewed the manuscript.  
8  
9

10 476

### 11 477 **Patient and Public Involvement**

12  
13  
14 478 No patients or members of the public were involved in study design or conduct.  
15  
16

17 479

18 480

19 481

20 482

21 483

22 484

23 485

24 486

25 487

26 488

27 489

28 490

29 491

30 492

31 493

32 494

33 495

34 496

35 497

36 60

498 **References**

- 499 1 The Equality Act. 2010. <https://www.legislation.gov.uk/ukpga/2010/15/contents>
- 500 2 World Health Organisation. *World report on disability 2011*. World Health Organisation  
501 2011.
- 502 3 Leonardi M, Bickenbach J, Ustun TB, *et al*. The definition of disability: what is in a  
503 name? *The Lancet* 2006;**368**:1219–21. doi:10.1016/S0140-6736(06)69498-1
- 504 4 Department for Work and Pensions. Family Resources Survey 2017-18.  
505 2019.[https://assets.publishing.service.gov.uk/government/uploads/system/uploads/attach  
506 ment\\_data/file/790000/family-resources-survey-2017-18.pdf](https://assets.publishing.service.gov.uk/government/uploads/system/uploads/attachment_data/file/790000/family-resources-survey-2017-18.pdf)
- 507 5 Equality and Human Rights Commission. Being disabled in Britain: A journey less equal.  
508 2017.
- 509 6 Office for National Statistics. Life Opportunities Survey: Wave 3 results.  
510 2015.<https://www.gov.uk/government/statistics/life-opportunities-survey-wave-3-results>
- 511 7 Equality and Human Rights Commission. Hidden in plain sight: inquiry into disability-  
512 related harassment. 2011.[https://www.equalityhumanrights.com/en/publication-  
513 download/hidden-plain-sight-inquiry-disability-related-harassment](https://www.equalityhumanrights.com/en/publication-download/hidden-plain-sight-inquiry-disability-related-harassment) (accessed 28 Mar  
514 2019).
- 515 8 European Union. *Discrimination in the EU in 2015*. 2015.
- 516 9 Sykes W, Groom C, Desai P. Disability-related harassment: the role of public bodies A  
517 qualitative research report. Manchester: : Equality and Human Rights Commission 2011.
- 518 10 Office for National Statistics. Crime Survey for England and Wales 2014-2015. 2016.
- 519 11 Scottish Government. Report of Independent Advisory Group on Hate Crime, Prejudice  
520 and Community Cohesion'. 2016.[https://www.gov.scot/publications/report-independent-  
521 advisory-group-hate-crime-prejudice-community-cohesion/](https://www.gov.scot/publications/report-independent-advisory-group-hate-crime-prejudice-community-cohesion/)
- 522 12 Corcoran H, Lader D, Smith K. Hate crime, England and Wales, 2014 to 2015. 2015.
- 523 13 Coleman N, Sykes W, Groom C. Barriers to employment and unfair treatment at work: a  
524 quantitative analysis of disabled people's experiences. Equality and Human Rights  
525 Commission 2013.
- 526 14 Pascoe EA, Smart Richman L. Perceived discrimination and health: a meta-analytic  
527 review. *Psychol Bull* 2009;**135**:531–54. doi:10.1037/a0016059
- 528 15 Goto JB, Couto PFM, Bastos JL. [Systematic review of epidemiological studies on  
529 interpersonal discrimination and mental health]. *Cad Saude Publica* 2013;**29**:445–59.
- 530 16 Schmitt MT, Branscombe NR, Postmes T, *et al*. The consequences of perceived  
531 discrimination for psychological well-being: a meta-analytic review. -. *Psychol Bull*  
532 2014;**140**:921–48.

- 1  
2  
3 533 17 Ali A, King M, Strydom A, *et al.* Self-reported stigma and symptoms of anxiety and  
4 534 depression in people with intellectual disabilities: Findings from a cross sectional study in  
5 535 England. *J Affect Disord* 2015;**187**:224–31. doi:10.1016/j.jad.2015.07.046  
6  
7  
8 536 18 Temple JB, Kelaher M. Is disability exclusion associated with psychological distress?  
9 537 Australian evidence from a national cross-sectional survey. *BMJ Open* 2018;**8**:e020829.  
10 538 doi:10.1136/bmjopen-2017-020829  
11  
12 539 19 Krnjacki L, Priest N, Aitken Z, *et al.* Disability-based discrimination and health: findings  
13 540 from an Australian-based population study. *Aust N Z J Public Health* 2018;**42**:172–4.  
14  
15 541 20 Wamala S, Bostrom G, Nyqvist K. Perceived discrimination and psychological distress in  
16 542 Sweden. *Br J Psychiatry* 2007;**190**:75–6.  
17  
18 543 21 Daley A, Phipps S, Branscombe NR. The social complexities of disability:  
19 544 Discrimination, belonging and life satisfaction among Canadian youth. *SSM - Popul*  
20 545 *Health* 2018;**5**:55–63. doi:10.1016/j.ssmph.2018.05.003  
21  
22  
23 546 22 Kim S. A Study of the Impact of Discrimination Experience on Life Satisfaction in  
24 547 Korean Women with Severe Disabilities. *World Acad Sci Eng Technol Int J Soc Behav*  
25 548 *Educ Econ Bus Ind Eng* 2015;**9**:3205–9.  
26  
27 549 23 Kagan M, Itzick M, Tal-Katz P. Demographic, Psychosocial, and Health- and Disability-  
28 550 Related Factors Associated With Psychological Distress Among People With Physical  
29 551 Disabilities. *Rehabil Psychol* 2018;**63**:392–9. doi:10.1037/rep0000206  
30  
31  
32 552 24 Du Mont J, Forte T. Perceived discrimination and self-rated health in Canada: an  
33 553 exploratory study. *BMC Public Health* 2016;**16**:742. doi:10.1186/s12889-016-3344-y  
34  
35 554 25 Alvarez-Galvez J, Salvador-Carulla L. Perceived discrimination and self-rated health in  
36 555 Europe: evidence from the European Social Survey (2010). *PloS One* 2013;**8**:e74252.  
37 556 doi:10.1371/journal.pone.0074252  
38  
39  
40 557 26 Emerson E. Self-reported exposure to disablism is associated with poorer self-reported  
41 558 health and well-being among adults with intellectual disabilities in England: A cross-  
42 559 sectional survey. *Public Health* 2010;**124**:682–9. doi:10.1016/j.puhe.2010.08.020  
43  
44 560 27 Sutin AR, Stephan Y, Carretta H, *et al.* Perceived discrimination and physical, cognitive,  
45 561 and emotional health in older adulthood. *Am J Geriatr Psychiatry Off J Am Assoc Geriatr*  
46 562 *Psychiatry* 2015;**23**:171–9. doi:10.1016/j.jagp.2014.03.007  
47  
48  
49 563 28 University of Essex. Institute for Social and Economic Research, NatCen Social  
50 564 Research, Kantar Public. *Understanding Society: Waves 1-7, 2009-2016 and Harmonised*  
51 565 *BHPS: Waves 1-18, 1991-2009*. 9th Edition. UK data service 2017.  
52  
53 566 29 Knies G. *Understanding society: The UK household longitudinal study, Waves 1–7 (User*  
54 567 *Guide)*. University of Essex: : Colchester: Institute for Social and Economic Research  
55 568 2017.  
56  
57  
58 569 30 McFall S, Nandi A, Platt L. *Understanding Society: UK Household Longitudinal Study:*  
59 570 *User Guide to Ethnicity and Immigration Research*. 4th ed. Colchester: : University of  
60 571 Essex 2017.

- 1  
2  
3 572 31 Goldberg D, Williams P. *A user's guide to the General Health Questionnaire*.  
4 573 Basingstoke: : NFER-Nelson 1988.
- 5  
6 574 32 Ware J, Kosinski M, Keller SD. A 12-Item Short-Form Health Survey: construction of  
7 575 scales and preliminary tests of reliability and validity. *Med Care* 1996;**34**:220–33.
- 8  
9 576 33 Ware JE. *How to score version 2 of the SF-12 health survey (with a supplement*  
10 577 *documenting version 1) Edition: first*. Lincoln, RI: : Health Assessment Lab 2002.
- 11  
12  
13 578 34 Steptoe A, Jackson SE. The Life Skills of Older Americans: Association with Economic,  
14 579 Psychological, Social, and Health Outcomes. *Sci Rep* 2018;**8**:9669. doi:10.1038/s41598-  
15 580 018-27909-w
- 16  
17 581 35 DeSalvo KB, Bloser N, Reynolds K, *et al*. Mortality prediction with a single general self-  
18 582 rated health question. A meta-analysis. *J Gen Intern Med* 2006;**21**:267–75.  
19 583 doi:10.1111/j.1525-1497.2005.00291.x
- 20  
21  
22 584 36 Hackett RA, Steptoe A, Jackson SE. Sex discrimination and mental health in women: A  
23 585 prospective analysis. *Health Psychol Off J Div Health Psychol Am Psychol Assoc*  
24 586 2019;**38**:1014–24. doi:10.1037/hea0000796
- 25  
26 587 37 World Health Organisation. *Depression and Other Common Mental Disorders: Global*  
27 588 *Health Estimates*. Geneva: : World Health Organisation 2017.
- 28  
29  
30 589 38 Wamala S, Merlo J, Boström G, *et al*. Perceived discrimination, socioeconomic  
31 590 disadvantage and refraining from seeking medical treatment in Sweden. *J Epidemiol*  
32 591 *Community Health* 2007;**61**:409–15. doi:10.1136/jech.2006.049999
- 33  
34 592 39 Sareen J, Afifi TO, McMillan KA, *et al*. Relationship Between Household Income and  
35 593 Mental Disorders: Findings From a Population-Based Longitudinal Study. *Arch Gen*  
36 594 *Psychiatry* 2011;**68**:419–27. doi:10.1001/archgenpsychiatry.2011.15
- 37  
38 595 40 OECD. *What are equivalence scales?* 2005.
- 39  
40  
41 596 41 Alvarez A, Faccioli J, Guinzbourg M, *et al*. Endocrine and inflammatory profiles in type  
42 597 2 diabetic patients with and without major depressive disorder. *BMC Res Notes*  
43 598 2013;**6**:61. doi:10.1186/1756-0500-6-61
- 44  
45 599 42 Rogers SE, Thrasher AD, Miao Y, *et al*. Discrimination in Healthcare Settings is  
46 600 Associated with Disability in Older Adults: Health and Retirement Study, 2008-2012. *J*  
47 601 *Gen Intern Med* 2015;**30**:1413–20. doi:10.1007/s11606-015-3233-6
- 48  
49 602 43 Moscoso-Porras MG, Alvarado GF. Association between perceived discrimination and  
50 603 healthcare-seeking behavior in people with a disability. *Disabil Health J* 2018;**11**:93–8.  
51 604 doi:10.1016/j.dhjo.2017.04.002
- 52  
53  
54 605 44 Ali A, Scior K, Ratti V, *et al*. Discrimination and other barriers to accessing health care:  
55 606 perspectives of patients with mild and moderate intellectual disability and their carers.  
56 607 *PloS One* 2013;**8**:e70855. doi:10.1371/journal.pone.0070855

- 1  
2  
3 608 45 Vaghela P, Sutin AR. Discrimination and sleep quality among older US adults: the  
4 609 mediating role of psychological distress. *Sleep Health J Natl Sleep Found* 2016;**2**:100–8.  
5 610 doi:10.1016/j.sleh.2016.02.003  
6  
7  
8 611 46 Li Li DM. disability and illicit drug use: an application of labeling theory. *Deviant Behav*  
9 612 2001;**22**:1–21. doi:10.1080/016396201750065784  
10  
11 613 47 Wansink B, Cheney MM, Chan N. Exploring comfort food preferences across age and  
12 614 gender. *Physiol Behav* 2003;**79**:739–47.  
13  
14 615 48 Sutin A, Robinson E, Daly M, *et al.* Weight discrimination and unhealthy eating-related  
15 616 behaviors. *Appetite* 2016;**102**:83–9. doi:10.1016/j.appet.2016.02.016  
16  
17 617 49 McEwen BS. Stress, adaptation, and disease. Allostasis and allostatic load. *Ann N Y Acad*  
18 618 *Sci* 1998;**840**:33–44.  
19  
20  
21 619 50 Lockwood KG, Marsland AL, Matthews KA, *et al.* Perceived discrimination and  
22 620 cardiovascular health disparities: a multisystem review and health neuroscience  
23 621 perspective. *Ann N Y Acad Sci* 2018;**1428**:170–207. doi:10.1111/nyas.13939  
24  
25 622 51 Busse D, Yim IS, Campos B, *et al.* Discrimination and the HPA axis: current evidence  
26 623 and future directions. *J Behav Med* 2017;**40**:539–52. doi:10.1007/s10865-017-9830-6  
27  
28 624 52 Korous KM, Causadias JM, Casper DM. Racial discrimination and cortisol output: A  
29 625 meta-analysis. *Soc Sci Med* 1982 2017;**193**:90–100.  
30 626 doi:10.1016/j.socscimed.2017.09.042  
31  
32  
33 627 53 Jackson SE, Kirschbaum C, Steptoe A. Perceived weight discrimination and chronic  
34 628 biochemical stress: A population-based study using cortisol in scalp hair. *Obes Silver*  
35 629 *Spring Md* 2016;**24**:2515–21. doi:10.1002/oby.21657  
36  
37 630 54 Sutin AR, Stephan Y, Luchetti M, *et al.* Perceived weight discrimination and C-reactive  
38 631 protein. *Obes Silver Spring Md* 2014;**22**:1959–61. doi:10.1002/oby.20789  
39  
40  
41 632 55 Slavich GM, Irwin MR. From stress to inflammation and major depressive disorder: a  
42 633 social signal transduction theory of depression. *Psychol Bull* 2014;**140**:774–815.  
43 634 doi:10.1037/a0035302  
44  
45 635 56 Alonso J, Buron A, Bruffaerts R, *et al.* Association of perceived stigma and mood and  
46 636 anxiety disorders: results from the World Mental Health Surveys. *Acta Psychiatr Scand*  
47 637 2008;**118**:305–14.  
48  
49  
50 638 57 Emerson E, Krnjacki L, Llewellyn G, *et al.* Perceptions of safety and exposure to  
51 639 violence in public places among working age adults with disabilities or long-term health  
52 640 conditions in the UK: cross sectional study. *Public Health* 2016;**135**:91–6.  
53 641 doi:10.1016/j.puhe.2015.10.036  
54  
55 642 58 Beckett AE, Buckner L. Promoting positive attitudes towards disabled people: definition  
56 643 of, rationale and prospects for anti-disablist education. *Br J Sociol Educ* 2012;**33**:873–91.  
57 644 doi:10.1080/01425692.2012.692046  
58  
59  
60



- 1  
2  
3 645 59 Silverman AM, Molton IR, Smith AE, *et al.* Solace in solidarity: Disability friendship  
4 646 networks buffer well-being. *Rehabil Psychol*;62:525–33.  
5  
6 647 60 Itzick M, Kagan M, Tal-Katz P. Perceived social support as a moderator between  
7 648 perceived discrimination and subjective well-being among people with physical  
8 649 disabilities in Israel. *Disabil Rehabil* 2018;40:2208–16.  
9 650 doi:10.1080/09638288.2017.1331380  
10  
11  
12  
13  
14  
15  
16  
17  
18  
19  
20  
21  
22  
23  
24  
25  
26  
27  
28  
29  
30  
31  
32  
33  
34  
35  
36  
37  
38  
39  
40  
41  
42  
43  
44  
45  
46  
47  
48  
49  
50  
51  
52  
53  
54  
55  
56  
57  
58  
59  
60

For peer review only

- 1  
2  
3 652  
4  
5  
6 653  
7  
8 654  
9  
10 655 1 The Equality Act. 2010. <https://www.legislation.gov.uk/ukpga/2010/15/contents>  
11  
12 656 2 World Health Organisation. *World report on disability 2011*. World Health Organisation  
13 657 2011.  
14  
15 658 3 Leonardi M, Bickenbach J, Ustun TB, *et al*. The definition of disability: what is in a  
16 659 name? *The Lancet* 2006;**368**:1219–21. doi:10.1016/S0140-6736(06)69498-1  
17  
18 660 4 Department for Work and Pensions. Family Resources Survey 2017-18.  
19 661 2019.[https://assets.publishing.service.gov.uk/government/uploads/system/uploads/attach](https://assets.publishing.service.gov.uk/government/uploads/system/uploads/attachment_data/file/790000/family-resources-survey-2017-18.pdf)  
20 662 [ment\\_data/file/790000/family-resources-survey-2017-18.pdf](https://assets.publishing.service.gov.uk/government/uploads/system/uploads/attachment_data/file/790000/family-resources-survey-2017-18.pdf)  
21  
22  
23 663 5 Equality and Human Rights Commission. *Being disabled in Britain: A journey less equal*.  
24 664 2017.  
25  
26 665 6 Office for National Statistics. *Life Opportunities Survey: Wave 3 results*.  
27 666 2015.<https://www.gov.uk/government/statistics/life-opportunities-survey-wave-3-results>  
28  
29 667 7 Equality and Human Rights Commission. *Hidden in plain sight: inquiry into disability-*  
30 668 *related harassment*. 2011.[https://www.equalityhumanrights.com/en/publication-](https://www.equalityhumanrights.com/en/publication-download/hidden-plain-sight-inquiry-disability-related-harassment)  
31 669 [download/hidden-plain-sight-inquiry-disability-related-harassment](https://www.equalityhumanrights.com/en/publication-download/hidden-plain-sight-inquiry-disability-related-harassment) (accessed 28 Mar  
32 670 2019).  
33  
34  
35 671 8 European Union. *Discrimination in the EU in 2015*. 2015.  
36  
37 672 9 Sykes W, Groom C, Desai P. *Disability-related harassment: the role of public bodies A*  
38 673 *qualitative research report*. Manchester: : Equality and Human Rights Commission 2011.  
39  
40 674 10 Office for National Statistics. *Crime Survey for England and Wales 2014-2015*. 2016.  
41  
42 675 11 Scottish Government. *Report of Independent Advisory Group on Hate Crime, Prejudice*  
43 676 *and Community Cohesion*’. 2016.[https://www.gov.scot/publications/report-independent-](https://www.gov.scot/publications/report-independent-advisory-group-hate-crime-prejudice-community-cohesion/)  
44 677 [advisory-group-hate-crime-prejudice-community-cohesion/](https://www.gov.scot/publications/report-independent-advisory-group-hate-crime-prejudice-community-cohesion/)  
45  
46  
47 678 12 Corcoran H, Lader D, Smith K. *Hate crime, England and Wales, 2014 to 2015*. 2015.  
48  
49 679 13 Coleman N, Sykes W, Groom C. *Barriers to employment and unfair treatment at work: a*  
50 680 *quantitative analysis of disabled people’s experiences*. Equality and Human Rights  
51 681 Commission 2013.  
52  
53 682 14 Pascoe EA, Smart Richman L. *Perceived discrimination and health: a meta-analytic*  
54 683 *review*. *Psychol Bull* 2009;**135**:531–54. doi:10.1037/a0016059  
55  
56  
57 684 15 Goto JB, Couto PFM, Bastos JL. [Systematic review of epidemiological studies on  
58 685 interpersonal discrimination and mental health]. *Cad Saude Publica* 2013;**29**:445–59.  
59  
60

- 1  
2  
3 686 16 Schmitt MT, Branscombe NR, Postmes T, *et al.* The consequences of perceived  
4 687 discrimination for psychological well-being: a meta-analytic review. -. *Psychol Bull*  
5 688 2014;**140**:921–48.
- 6  
7  
8 689 17 Ali A, King M, Strydom A, *et al.* Self-reported stigma and symptoms of anxiety and  
9 690 depression in people with intellectual disabilities: Findings from a cross sectional study in  
10 691 England. *J Affect Disord* 2015;**187**:224–31. doi:10.1016/j.jad.2015.07.046
- 11  
12 692 18 Temple JB, Kelaher M. Is disability exclusion associated with psychological distress?  
13 693 Australian evidence from a national cross-sectional survey. *BMJ Open* 2018;**8**:e020829.  
14 694 doi:10.1136/bmjopen-2017-020829
- 15  
16 695 19 Krnjacki L, Priest N, Aitken Z, *et al.* Disability-based discrimination and health: findings  
17 696 from an Australian-based population study. *Aust N Z J Public Health* 2018;**42**:172–4.
- 18  
19  
20 697 20 Wamala S, Bostrom G, Nyqvist K. Perceived discrimination and psychological distress in  
21 698 Sweden. *Br J Psychiatry* 2007;**190**:75–6.
- 22  
23 699 21 Daley A, Phipps S, Branscombe NR. The social complexities of disability:  
24 700 Discrimination, belonging and life satisfaction among Canadian youth. *SSM - Popul*  
25 701 *Health* 2018;**5**:55–63. doi:10.1016/j.ssmph.2018.05.003
- 26  
27  
28 702 22 Kim S. A Study of the Impact of Discrimination Experience on Life Satisfaction in  
29 703 Korean Women with Severe Disabilities. *World Acad Sci Eng Technol Int J Soc Behav*  
30 704 *Educ Econ Bus Ind Eng* 2015;**9**:3205–9.
- 31  
32 705 23 Kagan M, Itzick M, Tal-Katz P. Demographic, Psychosocial, and Health- and Disability-  
33 706 Related Factors Associated With Psychological Distress Among People With Physical  
34 707 Disabilities. *Rehabil Psychol* 2018;**63**:392–9. doi:10.1037/rep0000206
- 35  
36  
37 708 24 Du Mont J, Forte T. Perceived discrimination and self-rated health in Canada: an  
38 709 exploratory study. *BMC Public Health* 2016;**16**:742. doi:10.1186/s12889-016-3344-y
- 39  
40 710 25 Alvarez-Galvez J, Salvador-Carulla L. Perceived discrimination and self-rated health in  
41 711 Europe: evidence from the European Social Survey (2010). *PloS One* 2013;**8**:e74252.  
42 712 doi:10.1371/journal.pone.0074252
- 43  
44 713 26 Emerson E. Self-reported exposure to disablism is associated with poorer self-reported  
45 714 health and well-being among adults with intellectual disabilities in England: A cross-  
46 715 sectional survey. *Public Health* 2010;**124**:682–9. doi:10.1016/j.puhe.2010.08.020
- 47  
48  
49 716 27 Sutin AR, Stephan Y, Carretta H, *et al.* Perceived discrimination and physical, cognitive,  
50 717 and emotional health in older adulthood. *Am J Geriatr Psychiatry Off J Am Assoc Geriatr*  
51 718 *Psychiatry* 2015;**23**:171–9. doi:10.1016/j.jagp.2014.03.007
- 52  
53 719 28 University of Essex. Institute for Social and Economic Research, NatCen Social  
54 720 Research, Kantar Public. *Understanding Society: Waves 1-7, 2009-2016 and Harmonised*  
55 721 *BHPS: Waves 1-18, 1991-2009*. 9th Edition. UK data service 2017.
- 56  
57  
58 722 29 Knies G. *Understanding society: The UK household longitudinal study, Waves 1–7 (User*  
59 723 *Guide)*. University of Essex: : Colchester: Institute for Social and Economic Research  
60 724 2017.

- 1  
2  
3 725 30 McFall S, Nandi A, Platt L. *Understanding Society: UK Household Longitudinal Study: User Guide to Ethnicity and Immigration Research*. 4th ed. Colchester: : University of  
4 726  
5 727 Essex 2017.
- 7 728 31 Goldberg D, Williams P. *A user's guide to the General Health Questionnaire*.  
9 729 Basingstoke: : NFER-Nelson 1988.
- 11 730 32 Ware J, Kosinski M, Keller SD. A 12-Item Short-Form Health Survey: construction of  
12 731 scales and preliminary tests of reliability and validity. *Med Care* 1996;**34**:220–33.
- 14 732 33 Ware JE. *How to score version 2 of the SF-12 health survey (with a supplement documenting version 1) Edition: first*. Lincoln, RI: : Health Assessment Lab 2002.  
15 733
- 17 734 34 Steptoe A, Jackson SE. The Life Skills of Older Americans: Association with Economic,  
18 735 Psychological, Social, and Health Outcomes. *Sci Rep* 2018;**8**:9669. doi:10.1038/s41598-  
20 736 018-27909-w
- 22 737 35 DeSalvo KB, Bloser N, Reynolds K, *et al*. Mortality prediction with a single general self-  
23 738 rated health question. A meta-analysis. *J Gen Intern Med* 2006;**21**:267–75.  
24 739 doi:10.1111/j.1525-1497.2005.00291.x
- 26 740 36 Hackett RA, Steptoe A, Jackson SE. Sex discrimination and mental health in women: A  
27 741 prospective analysis. *Health Psychol Off J Div Health Psychol Am Psychol Assoc*  
28 742 2019;**38**:1014–24. doi:10.1037/hea0000796
- 30 743 37 World Health Organisation. *Depression and Other Common Mental Disorders: Global Health Estimates*. Geneva: : World Health Organisation 2017.  
31 744
- 34 745 38 Wamala S, Merlo J, Boström G, *et al*. Perceived discrimination, socioeconomic  
35 746 disadvantage and refraining from seeking medical treatment in Sweden. *J Epidemiol Community Health* 2007;**61**:409–15. doi:10.1136/jech.2006.049999  
36 747
- 38 748 39 Sareen J, Afifi TO, McMillan KA, *et al*. Relationship Between Household Income and  
39 749 Mental Disorders: Findings From a Population-Based Longitudinal Study. *Arch Gen Psychiatry* 2011;**68**:419–27. doi:10.1001/archgenpsychiatry.2011.15  
40 750
- 42 751 40 OECD. *What are equivalence scales?* 2005.
- 44 752 41 Alvarez A, Faccioli J, Guinzbourg M, *et al*. Endocrine and inflammatory profiles in type  
45 753 2 diabetic patients with and without major depressive disorder. *BMC Res Notes*  
46 754 2013;**6**:61. doi:10.1186/1756-0500-6-61
- 48 755 42 Rogers SE, Thrasher AD, Miao Y, *et al*. Discrimination in Healthcare Settings is  
49 756 Associated with Disability in Older Adults: Health and Retirement Study, 2008-2012. *J Gen Intern Med* 2015;**30**:1413–20. doi:10.1007/s11606-015-3233-6  
50 757
- 52 758 43 Moscoso-Porras MG, Alvarado GF. Association between perceived discrimination and  
53 759 healthcare-seeking behavior in people with a disability. *Disabil Health J* 2018;**11**:93–8.  
54 760 doi:10.1016/j.dhjo.2017.04.002

- 1  
2  
3 761 44 Ali A, Scior K, Ratti V, *et al.* Discrimination and other barriers to accessing health care:  
4 762 perspectives of patients with mild and moderate intellectual disability and their carers.  
5 763 *PloS One* 2013;**8**:e70855. doi:10.1371/journal.pone.0070855  
6  
7 764 45 Vaghela P, Sutin AR. Discrimination and sleep quality among older US adults: the  
8 765 mediating role of psychological distress. *Sleep Health J Natl Sleep Found* 2016;**2**:100–8.  
9 766 doi:10.1016/j.sleh.2016.02.003  
10  
11 767 46 Li Li DM. disability and illicit drug use: an application of labeling theory. *Deviant Behav*  
12 768 2001;**22**:1–21. doi:10.1080/016396201750065784  
13  
14 769 47 Wansink B, Cheney MM, Chan N. Exploring comfort food preferences across age and  
15 770 gender. *Physiol Behav* 2003;**79**:739–47.  
16  
17 771 48 Sutin A, Robinson E, Daly M, *et al.* Weight discrimination and unhealthy eating-related  
18 772 behaviors. *Appetite* 2016;**102**:83–9. doi:10.1016/j.appet.2016.02.016  
19  
20 773 49 McEwen BS. Stress, adaptation, and disease. Allostasis and allostatic load. *Ann N Y Acad*  
21 774 *Sci* 1998;**840**:33–44.  
22  
23 775 50 Lockwood KG, Marsland AL, Matthews KA, *et al.* Perceived discrimination and  
24 776 cardiovascular health disparities: a multisystem review and health neuroscience  
25 777 perspective. *Ann N Y Acad Sci* 2018;**1428**:170–207. doi:10.1111/nyas.13939  
26  
27 778 51 Busse D, Yim IS, Campos B, *et al.* Discrimination and the HPA axis: current evidence  
28 779 and future directions. *J Behav Med* 2017;**40**:539–52. doi:10.1007/s10865-017-9830-6  
29  
30 780 52 Korous KM, Causadias JM, Casper DM. Racial discrimination and cortisol output: A  
31 781 meta-analysis. *Soc Sci Med* 1982 2017;**193**:90–100.  
32 782 doi:10.1016/j.socscimed.2017.09.042  
33  
34 783 53 Jackson SE, Kirschbaum C, Steptoe A. Perceived weight discrimination and chronic  
35 784 biochemical stress: A population-based study using cortisol in scalp hair. *Obes Silver*  
36 785 *Spring Md* 2016;**24**:2515–21. doi:10.1002/oby.21657  
37  
38 786 54 Sutin AR, Stephan Y, Luchetti M, *et al.* Perceived weight discrimination and C-reactive  
39 787 protein. *Obes Silver Spring Md* 2014;**22**:1959–61. doi:10.1002/oby.20789  
40  
41 788 55 Slavich GM, Irwin MR. From stress to inflammation and major depressive disorder: a  
42 789 social signal transduction theory of depression. *Psychol Bull* 2014;**140**:774–815.  
43 790 doi:10.1037/a0035302  
44  
45 791 56 Alonso J, Buron A, Bruffaerts R, *et al.* Association of perceived stigma and mood and  
46 792 anxiety disorders: results from the World Mental Health Surveys. *Acta Psychiatr Scand*  
47 793 2008;**118**:305–14.  
48  
49 794 57 Emerson E, Krnjacki L, Llewellyn G, *et al.* Perceptions of safety and exposure to  
50 795 violence in public places among working age adults with disabilities or long-term health  
51 796 conditions in the UK: cross sectional study. *Public Health* 2016;**135**:91–6.  
52 797 doi:10.1016/j.puhe.2015.10.036  
53  
54  
55  
56  
57  
58  
59  
60

- 1  
2  
3 798 58 Beckett AE, Buckner L. Promoting positive attitudes towards disabled people: definition  
4 799 of, rationale and prospects for anti-disablist education. *Br J Sociol Educ* 2012;**33**:873–91.  
5 800 doi:10.1080/01425692.2012.692046  
6  
7  
8 801 59 Silverman AM, Molton IR, Smith AE, *et al.* Solace in solidarity: Disability friendship  
9 802 networks buffer well-being. *Rehabil Psychol*;**62**:525–33.  
10  
11 803 60 Itzick M, Kagan M, Tal-Katz P. Perceived social support as a moderator between  
12 804 perceived discrimination and subjective well-being among people with physical  
13 805 disabilities in Israel. *Disabil Rehabil* 2018;**40**:2208–16.  
14 806 doi:10.1080/09638288.2017.1331380  
15  
16  
17  
18  
19  
20  
21  
22  
23  
24  
25  
26  
27  
28  
29  
30  
31  
32  
33  
34  
35  
36  
37  
38  
39  
40  
41  
42  
43  
44  
45  
46  
47  
48  
49  
50  
51  
52  
53  
54  
55  
56  
57  
58  
59  
60

For peer review only

**Table 1** Associations between perceived disability discrimination and sociodemographic factors (wave 1) and wellbeing measures (waves 1 and 5)

|                             | Overall sample (n = 871) | No perceived discrimination (n = 754) | Perceived discrimination (n = 117) | p       |
|-----------------------------|--------------------------|---------------------------------------|------------------------------------|---------|
| Age (years)                 | 52.73 (16.43)            | 53.42 (16.56)                         | 48.29 (14.89)                      | 0.001   |
| 17-34                       | 120 (13.7%)              | 100 (13.3%)                           | 20 (17.1%)                         |         |
| 35-44                       | 172 (19.7%)              | 149 (19.8%)                           | 23 (19.7%)                         |         |
| 45-54                       | 184 (21.1%)              | 150 (19.9%)                           | 34 (29.1%)                         |         |
| 55-64                       | 157 (18.0%)              | 134 (17.8%)                           | 23 (19.7%)                         |         |
| 65+                         | 238 (27.3%)              | 221 (29.3%)                           | 17 (14.5%)                         |         |
| Sex (% men)                 | 388 (44.5%)              | 334 (44.3%)                           | 54 (46.2%)                         | 0.707   |
| Household income (£)        | 1118.42 (902.54)         | 1123.28 (930.47)                      | 1087.07 (698.65)                   | 0.687   |
| £0-499                      | 117 (13.4%)              | 105 (13.9%)                           | 12 (10.3%)                         |         |
| £500-999                    | 369 (42.4%)              | 314 (41.6%)                           | 55 (47.0%)                         |         |
| £1000-1499                  | 216 (24.8%)              | 189 (25.1%)                           | 27 (23.1%)                         |         |
| £1500-1999                  | 90 (10.3%)               | 77 (10.2%)                            | 13 (11.1%)                         |         |
| £2000+                      | 79 (9.1%)                | 69 (9.2%)                             | 10 (8.5%)                          |         |
| Education (% yes)           |                          |                                       |                                    | 0.003   |
| University Degree           | 204 (23.4%)              | 171 (22.7%)                           | 33 (28.2%)                         | -       |
| School qualification        | 342 (39.3%)              | 285 (37.8%)                           | 57 (48.7%)                         | -       |
| No qualification            | 325 (37.3%)              | 298 (39.5%)                           | 27 (23.1%)                         | -       |
| Ethnicity                   |                          |                                       |                                    | 0.002   |
| White                       | 185 (21.2%)              | 153 (20.3%)                           | 32 (27.4%)                         | -       |
| South Asian                 | 369 (42.4%)              | 333 (44.2%)                           | 36 (30.8%)                         | -       |
| Black                       | 189 (21.7%)              | 168 (22.3%)                           | 21 (17.9%)                         | -       |
| Other                       | 128 (14.7%)              | 100 (13.3%)                           | 28 (23.9%)                         | -       |
| Disability type             |                          |                                       |                                    | < 0.001 |
| Physical                    | 367 (42.1%)              | 351 (46.6%)                           | 16 (13.7%)                         |         |
| Sensory                     | 95 (10.9%)               | 84 (11.1%)                            | 11 (9.4%)                          |         |
| Cognitive                   | 87 (10.0%)               | 73 (9.7%)                             | 14 (12.0%)                         |         |
| Other                       | 322 (37.0%)              | 246 (32.6%)                           | 76 (65.0%)                         |         |
| Wellbeing measures (wave 1) |                          |                                       |                                    |         |
| Depression                  | 115 (13.2%)              | 65 (8.7%)                             | 50 (42.7%)                         | < 0.001 |
| Psychological distress      | 3.43 (3.85)              | 2.85 (3.49)                           | 6.65 (4.18)                        | < 0.001 |
| SF-12 mental                | 43.87 (12.61)            | 45.16 (12.22)                         | 35.72 (12.02)                      | < 0.001 |
| Life satisfaction           | 4.49 (1.71)              | 4.71 (1.63)                           | 3.29 (1.67)                        | < 0.001 |
| Fair/poor self-rated health | 620 (71.2%)              | 525 (69.6%)                           | 95 (81.2%)                         | 0.010   |
| Wellbeing measures (wave 5) |                          |                                       |                                    |         |
| Psychological distress      | 3.33 (3.99)              | 2.86 (3.82)                           | 5.98 (3.91)                        | < 0.001 |
| SF-12 mental                | 44.38 (12.20)            | 45.79 (11.62)                         | 36.47 (12.51)                      | < 0.001 |
| Life satisfaction           | 4.48 (1.61)              | 4.62 (1.57)                           | 3.67 (1.64)                        | < 0.001 |
| Fair/poor self-rated health | 276 (62.7%)              | 235 (61.0%)                           | 41 (74.5%)                         | 0.053   |

Data are presented as means (SD) and n (%). Percentages are valid percent.

**Table 2:** Cross-sectional and prospective associations between perceived disability discrimination and wellbeing outcomes

|                             | <b>Depression</b><br>OR (95% CI) | <b>Psychological distress</b><br><i>B</i> (95% CI) | <b>SF-12 mental</b><br><i>B</i> (95% CI) | <b>Life satisfaction</b><br><i>B</i> (95% CI) | <b>Fair/poor self-rated health</b><br><i>B</i> (95% CI) |
|-----------------------------|----------------------------------|----------------------------------------------------|------------------------------------------|-----------------------------------------------|---------------------------------------------------------|
| <b>Wave 1</b>               |                                  |                                                    |                                          |                                               |                                                         |
| No perceived discrimination | 1 (Reference) <sup>a</sup>       | Reference <sup>b</sup>                             | Reference <sup>c</sup>                   | Reference <sup>d</sup>                        | 1 (Reference) <sup>e</sup>                              |
| Perceived discrimination    | 5.40 [3.25; 8.97] <sup>***</sup> | 3.28 [2.41; 4.14] <sup>***</sup>                   | -7.35 [-9.70; -5.02] <sup>***</sup>      | -1.27 [-1.66; -0.87] <sup>***</sup>           | 2.05 [1.19; 3.51] <sup>**</sup>                         |
| <b>Wave 5</b>               |                                  |                                                    |                                          |                                               |                                                         |
| No perceived discrimination | -                                | Reference <sup>f</sup>                             | Reference <sup>g</sup>                   | Reference <sup>h</sup>                        | 1 (Reference) <sup>i</sup>                              |
| Perceived discrimination    | -                                | 2.88 [1.39; 4.36] <sup>***</sup>                   | -5.12 [-8.91; -1.34] <sup>**</sup>       | -0.53 [-1.18; 0.11]                           | 1.29 [0.59; 2.83]                                       |

All analyses are adjusted for age, sex, household income, education, ethnicity and disability type. Prospective analyses are additionally adjusted for baseline wellbeing status/score.

<sup>a</sup>= *n*= 751 for the no perceived discrimination group; *n*= 117 for the perceived discrimination group; <sup>b</sup>= *n*= 454 for the no perceived discrimination group; *n*= 82 for the perceived discrimination group; <sup>c</sup>= *n*= 742 for the no perceived discrimination group; *n*= 117 for the perceived discrimination group; <sup>d</sup>= *n*= 454 for the no perceived discrimination group; *n*= 84 for the perceived discrimination group; <sup>e</sup>= *n*= 754 for the no perceived discrimination group; *n*= 117 for the perceived discrimination group; <sup>f</sup>= *n*= 177 for the no perceived discrimination group; *n*= 31 for the perceived discrimination group; <sup>g</sup>= *n*= 239 for the no perceived discrimination group; *n*= 43 for the perceived discrimination group; <sup>h</sup>= *n*= 171 for the no perceived discrimination group; *n*= 34 for the perceived discrimination group; <sup>i</sup>= *n*= 385 for the no perceived discrimination group; *n*= 55 for the perceived discrimination group.

CI = confidence interval, OR = odds ratio

\**p*<0.05, \*\**p*<0.01, \*\*\**p*<0.001

Possible scores on the psychological distress scale range from 0-12, SF-12 mental component scale range from 0-100 and the life satisfaction scale scores range from 0-7.

For peer review only



**Table 3:** Cross-sectional and prospective associations between perceived disability discrimination and wellbeing outcomes (complete cases at wave 5)

|                             | Psychological distress <sup>a</sup><br><i>B</i> (95% CI) | SF-12 mental <sup>b</sup><br><i>B</i> (95% CI) | Life satisfaction <sup>c</sup><br><i>B</i> (95% CI) | Fair/poor self-rated health <sup>d</sup><br><i>B</i> (95% CI) |
|-----------------------------|----------------------------------------------------------|------------------------------------------------|-----------------------------------------------------|---------------------------------------------------------------|
| <b>Wave 1</b>               |                                                          |                                                |                                                     |                                                               |
| No perceived discrimination | Reference                                                | Reference                                      | Reference                                           | 1 (Reference)                                                 |
| Perceived discrimination    | 2.65 [1.21; 4.08]***                                     | -7.20 [-11.01; -3.39]***                       | -1.27 [-1.91; -0.63]***                             | 2.66 [1.16; 6.08]*                                            |
| <b>Wave 5</b>               |                                                          |                                                |                                                     |                                                               |
| No perceived discrimination | Reference                                                | Reference                                      | Reference                                           | 1 (Reference)                                                 |
| Perceived discrimination    | 2.88 [1.39; 4.36]***                                     | -5.12 [-8.91; -1.34]**                         | -0.53 [-1.18; 0.11]                                 | 1.29 [0.59; 2.83]                                             |

All analyses are adjusted for age, sex, household income, education, ethnicity and disability type. Prospective analyses are additionally adjusted for baseline wellbeing status/score.

<sup>a</sup>= *n* = 177 for the no perceived discrimination group; *n* = 31 for the perceived discrimination group; <sup>b</sup>= *n* = 239 for the no perceived discrimination group; *n* = 43 for the perceived discrimination group; <sup>c</sup>= *n* = 171 for the no perceived discrimination group; *n* = 34 for the perceived discrimination group; <sup>d</sup>= *n* = 385 for the no perceived discrimination group; *n* = 55 for the perceived discrimination group.

CI = confidence interval, OR = odds ratio

\**p* < 0.05, \*\**p* < 0.01, \*\*\**p* < 0.001

Possible scores on the psychological distress scale range from 0-12, SF-12 mental component scale range from 0-100 and the life satisfaction scale scores range from 0-7.

**Table 4** Participant characteristics at wave 1 (2009/10) of complete cases and those lost to follow-up

|                                 | Lost to follow-up<br>(n=431) | Complete cases<br>(n=440) | <i>p</i> |
|---------------------------------|------------------------------|---------------------------|----------|
| Age (years)                     | 52.26 (17.08)                | 53.19 (15.76)             | 0.407    |
| 17-34                           | 25 (5.8%)                    | 12 (2.7%)                 |          |
| 35-44                           | 46 (10.7%)                   | 37 (8.4%)                 |          |
| 45-54                           | 79 (18.4%)                   | 93 (21.1%)                |          |
| 55-64                           | 91 (21.2%)                   | 93 (21.1%)                |          |
| 65+                             | 189 (44.0%)                  | 205 (46.6%)               |          |
| Sex (% men)                     | 200 (46.4%)                  | 188 (42.7%)               | 0.275    |
| Household income (£)            | 1101.26 (1037.11)            | 1135.22 (748.46)          | 0.579    |
| £0-499                          | 69 (16.0%)                   | 48 (10.9%)                |          |
| £500-999                        | 175 (40.6%)                  | 194 (44.1%)               |          |
| £1000-1499                      | 113 (26.2%)                  | 103 (23.4%)               |          |
| £1500-1999                      | 42 (9.7%)                    | 48 (10.9%)                |          |
| £2000+                          | 32 (7.4%)                    | 47 (10.7%)                |          |
| Education (% yes)               |                              |                           | 0.024    |
| University Degree               | 85 (19.7%)                   | 119 (27.0%)               | -        |
| School qualification            | 171 (39.7%)                  | 171 (38.9%)               | -        |
| No qualification                | 175 (40.6%)                  | 150 (34.1%)               | -        |
| Ethnicity                       |                              |                           | 0.213    |
| White                           | 88 (20.4%)                   | 97 (22.0%)                | -        |
| South Asian                     | 172 (39.9%)                  | 197 (44.8%)               | -        |
| Black                           | 105 (24.4%)                  | 84 (19.1%)                | -        |
| Other                           | 66 (15.3%)                   | 62 (14.1%)                | -        |
| Disability type                 |                              |                           | 0.189    |
| Physical                        | 166 (38.5%)                  | 201 (45.7%)               |          |
| Sensory                         | 51 (11.8%)                   | 44 (10.0%)                |          |
| Cognitive                       | 47 (10.9%)                   | 40 (9.1%)                 |          |
| Other                           | 167 (38.7%)                  | 155 (35.2%)               |          |
| Mental wellbeing                |                              |                           |          |
| Psychological distress          | 3.46 (3.85)                  | 3.41 (3.86)               | 0.874    |
| SF-12                           | 43.72 (12.93)                | 44.01 (12.30)             | 0.741    |
| Life satisfaction               | 4.40 (1.75)                  | 4.56 (1.69)               | 0.306    |
| Self-rated health (% fair/poor) | 319 (74.0%)                  | 301 (68.4%)               | 0.068    |

1  
2  
3 Data are presented as means (SD) and n (%)

4 \*Complete cases are defined as those who were present at wave 1 and provided data on at least one  
5 wellbeing measure at wave 5.  
6  
7  
8  
9  
10  
11  
12  
13  
14  
15  
16  
17  
18  
19  
20  
21  
22  
23  
24  
25  
26  
27  
28  
29  
30  
31  
32  
33  
34  
35  
36  
37  
38  
39  
40  
41  
42  
43  
44  
45  
46

For peer review only

**Table 5:** Sensitivity analysis: Perceived disability discrimination measure excluding each discriminatory behaviour in turn

| Cross-sectional analyses (wave 1) |                   | Model 1                    | Model 2                     | Model 3                    | Model 4                    |
|-----------------------------------|-------------------|----------------------------|-----------------------------|----------------------------|----------------------------|
| Depression                        | OR<br>[95%CI]     | 4.41<br>(2.55;7.60)***     | 5.24<br>(3.06;8.98)***      | 4.80<br>(2.92;7.88)***     | 5.41 (3.26;8.98)***        |
| Psychological distress            | Coeff.<br>[95%CI] | 3.64<br>(2.68;4.60)***     | 3.28<br>(2.33;4.23)***      | 3.13<br>(2.26;4.01)***     | 3.27 (2.41;4.14)***        |
| SF-12 mental                      | Coeff.<br>[95%CI] | -6.63 (-9.29;-<br>3.97)*** | -7.61 (-10.15;-<br>5.08)*** | -7.53 (-9.89;-<br>5.18)*** | -7.35 (-9.68;-<br>5.02)*** |
| Life satisfaction                 | Coeff.<br>[95%CI] | -1.23 (-1.69;-<br>0.76)*** | -1.45 (-1.88;-<br>1.02)***  | -1.24 (-1.64;-<br>0.85)*** | -1.27 (-1.66;-<br>0.87)*** |
| Fair/poor self-rated health       | OR<br>[95%CI]     | 1.92<br>(1.04;3.53)*       | 2.39<br>(1.32;4.33)**       | 2.21<br>(1.28;3.81)**      | 2.04 (1.19;3.50)**         |
| Prospective analyses (wave 5)     |                   | Model 1                    | Model 2                     | Model 3                    | Model 4                    |
| Psychological distress            | Coeff.<br>[95%CI] | 2.78<br>(1.14;4.41)***     | 2.69<br>(1.15;4.24)***      | 2.89<br>(1.45;4.33)***     | 2.88 (1.39;4.36)***        |
| SF-12 mental                      | Coeff.<br>[95%CI] | -4.33 (-<br>8.81;0.14)     | -4.90 (-8.86;-<br>0.94)**   | -5.94 (-9.59;-<br>2.28)**  | -5.13 (-8.91;-<br>1.34)**  |
| Life satisfaction                 | Coeff.<br>[95%CI] | -0.39 (-<br>1.14;0.36)     | -0.37 (-<br>1.06;0.32)      | -0.39 (-1.02;0.25)         | -0.53 (-1.18;0.11)         |
| Fair/poor self-rated health       | OR<br>[95%CI]     | 1.23<br>(0.50;3.03)        | 1.30<br>(0.57;2.95)         | 1.31 (0.61;2.83)           | 1.29 (0.59;2.83)           |

All analyses are adjusted for age, sex, household income, education, ethnicity and disability type.

Prospective analyses are additionally adjusted for baseline wellbeing status/score.

Model 1 excludes "felt unsafe at some place" from the measure of perceived gender discrimination; Model 2 excludes "avoided some place"; Model 3 excludes "was insulted at some place"; and Model 4 excludes "was attacked at some place"

Coeff = unstandardized B coefficient (white rows), CI = confidence interval, OR = odds ratio (grey rows), SE = standard error.

\* $p < 0.05$ , \*\* $p < 0.01$ , \*\*\* $p < 0.001$

Possible scores on the psychological distress scale range from 0-12, SF-12 mental component scale range from 0-100 and the life satisfaction scale scores range from 0-7.

**Supplementary table 1:** Perceived disability discrimination types and settings by type of disability

| Types of discrimination    | Physical   | Sensory   | Cognitive  | Other      | <i>p</i> value |
|----------------------------|------------|-----------|------------|------------|----------------|
| Felt unsafe at someplace   | 12 (85.7%) | 9 (90%)   | 12 (92.3%) | 60 (84.5%) | 0.874          |
| Avoided at someplace       | 8 (53.3%)  | 6 (75%)   | 9 (75%)    | 52 (69.3%) | 0.336          |
| Felt insulted at someplace | 3 (25%)    | 1 (12.5%) | 1 (10%)    | 15 (27.3%) | 0.572          |
| Attacked at someplace      | 0 (0%)     | 0 (0%)    | 0(0%)      | 3(4.4%)    | 0.621          |
| <b>Settings</b>            |            |           |            |            |                |
| School/work                | 2 (12.5%)  | 1 (9.1%)  | 0 (0%)     | 12 (15.8%) | 0.424          |
| Public transport           | 10 (62.5%) | 3 (27.3%) | 6 (42.9%)  | 41 (53.9%) | 0.266          |
| Bus or train stations      | 5 (31.3%)  | 2 (18.2%) | 6 (42.9%)  | 34 (44.7%) | 0.328          |
| Taxis                      | 4 (25%)    | 0 (0%)    | 1 (7.1%)   | 9 (11.8%)  | 0.223          |
| Public buildings           | 8 (50%)    | 7 (63.6%) | 7 (50%)    | 48 (63.2%) | 0.654          |
| On the street              | 12 (75%)   | 8 (72.7%) | 9 (64.3%)  | 62 (81.6%) | 0.504          |
| At home                    | 3 (18.8%)  | 3 (27.3%) | 4 (28.6%)  | 20 (26.3%) | 0.920          |

Data are presented as numbers (% yes)

1  
2  
3  
4  
5  
6  
7  
8  
9  
10  
11  
12  
13  
14  
15  
16  
17  
18  
19  
20  
21  
22  
23  
24  
25  
26  
27  
28  
29  
30  
31  
32  
33  
34  
35  
36  
37  
38  
39  
40  
41  
42  
43  
44  
45  
46

**Supplementary table 2:** Prospective associations between perceived disability discrimination and wellbeing outcomes (imputed analysis)

|                             | Psychological distress <sup>a</sup> | SF-12 mental <sup>b</sup> | Life satisfaction <sup>c</sup> | Fair/poor self-rated health <sup>d</sup> |
|-----------------------------|-------------------------------------|---------------------------|--------------------------------|------------------------------------------|
|                             | <i>B</i> (95% CI)                   | <i>B</i> (95% CI)         | <i>B</i> (95% CI)              | <i>B</i> (95% CI)                        |
| <b>Wave 5</b>               |                                     |                           |                                |                                          |
| No perceived discrimination | Reference<br>0.22 [-3.21; 3.64]     | Reference                 | Reference                      | 1 (Reference)<br>1.38 [0.65; 2.93]       |
| Perceived discrimination    |                                     | -4.55 [-8.75; -0.34]*     | -0.49 [-1.10; 0.12]            |                                          |

All analyses are adjusted for age, sex, household income, education, ethnicity and disability type. Prospective analyses are additionally adjusted for baseline wellbeing status/score.

<sup>a</sup>= *n*= 454 for the no perceived discrimination group; *n*= 82 for the perceived discrimination group; <sup>b</sup>= *n*= 742 for the no perceived discrimination group; *n*= 117 for the perceived discrimination group; <sup>c</sup>= *n*= 454 for the no perceived discrimination group; *n*= 84 for the perceived discrimination group; <sup>d</sup>= *n*= 754 for the no perceived discrimination group; *n*= 117 for the perceived discrimination group  
\**p*<0.05, \*\**p*<0.01, \*\*\**p*<0.001

CI = confidence interval, OR = odds ratio

Possible scores on the psychological distress scale range from 0-12, SF-12 mental component scale range from 0-100 and the life satisfaction scale scores range from 0-7.

1  
2  
3  
4  
5  
6  
7  
8  
9  
10  
11  
12  
13  
14  
15  
16  
17  
18  
19  
20  
21  
22  
23  
24  
25  
26  
27  
28  
29  
30  
31  
32  
33  
34  
35  
36  
37  
38  
39  
40  
41  
42  
43  
44  
45  
46  
47  
48  
49  
50  
51  
52  
53  
54  
55  
56  
57  
58  
59  
60

For peer review only

# Reporting checklist for cohort study.

Based on the STROBE cohort guidelines.

## Instructions to authors

Complete this checklist by entering the page numbers from your manuscript where readers will find each of the items listed below.

Your article may not currently address all the items on the checklist. Please modify your text to include the missing information. If you are certain that an item does not apply, please write "n/a" and provide a short explanation.

Upload your completed checklist as an extra file when you submit to a journal.

In your methods section, say that you used the STROBE cohort reporting guidelines, and cite them as:

von Elm E, Altman DG, Egger M, Pocock SJ, Gøtzsche PC, Vandenbroucke JP. The Strengthening the Reporting of Observational Studies in Epidemiology (STROBE) Statement: guidelines for reporting observational studies.

|                           |                     |                                                                                    | Page   |
|---------------------------|---------------------|------------------------------------------------------------------------------------|--------|
|                           |                     | Reporting Item                                                                     | Number |
| <b>Title and abstract</b> |                     |                                                                                    |        |
| Title                     | <a href="#">#1a</a> | Indicate the study's design with a commonly used term in the title or the abstract | 1      |
| Abstract                  | <a href="#">#1b</a> | Provide in the abstract an informative and balanced summary                        | 2      |



of what was done and what was found

## Introduction

Background / [#2](#) Explain the scientific background and rationale for the 4  
 rationale investigation being reported

Objectives [#3](#) State specific objectives, including any prespecified 6  
 hypotheses

## Methods

Study design [#4](#) Present key elements of study design early in the paper 6

Setting [#5](#) Describe the setting, locations, and relevant dates, including 6  
 periods of recruitment, exposure, follow-up, and data collection

Eligibility criteria [#6a](#) Give the eligibility criteria, and the sources and methods of 6  
 selection of participants. Describe methods of follow-up.

Eligibility criteria [#6b](#) For matched studies, give matching criteria and number of N/A  
 exposed and unexposed

Variables [#7](#) Clearly define all outcomes, exposures, predictors, potential 7-8  
 confounders, and effect modifiers. Give diagnostic criteria, if applicable

Data sources / [#8](#) For each variable of interest give sources of data and details of 7-8  
 measurement methods of assessment (measurement). Describe comparability of assessment methods if there is more than one group. Give information separately for for exposed and unexposed groups if applicable.

|    |                |                      |                                                                   |      |
|----|----------------|----------------------|-------------------------------------------------------------------|------|
| 1  | Bias           | <a href="#">#9</a>   | Describe any efforts to address potential sources of bias         | 8    |
| 2  |                |                      |                                                                   |      |
| 3  |                |                      |                                                                   |      |
| 4  | Study size     | <a href="#">#10</a>  | Explain how the study size was arrived at                         | 6    |
| 5  |                |                      |                                                                   |      |
| 6  |                |                      |                                                                   |      |
| 7  | Quantitative   | <a href="#">#11</a>  | Explain how quantitative variables were handled in the            | 9    |
| 8  | variables      |                      | analyses. If applicable, describe which groupings were chosen,    |      |
| 9  |                |                      | and why                                                           |      |
| 10 |                |                      |                                                                   |      |
| 11 |                |                      |                                                                   |      |
| 12 |                |                      |                                                                   |      |
| 13 |                |                      |                                                                   |      |
| 14 |                |                      |                                                                   |      |
| 15 | Statistical    | <a href="#">#12a</a> | Describe all statistical methods, including those used to control | 9    |
| 16 | methods        |                      | for confounding                                                   |      |
| 17 |                |                      |                                                                   |      |
| 18 |                |                      |                                                                   |      |
| 19 |                |                      |                                                                   |      |
| 20 | Statistical    | <a href="#">#12b</a> | Describe any methods used to examine subgroups and                | 9    |
| 21 | methods        |                      | interactions                                                      |      |
| 22 |                |                      |                                                                   |      |
| 23 |                |                      |                                                                   |      |
| 24 |                |                      |                                                                   |      |
| 25 |                |                      |                                                                   |      |
| 26 | Statistical    | <a href="#">#12c</a> | Explain how missing data were addressed                           | 6    |
| 27 | methods        |                      |                                                                   |      |
| 28 |                |                      |                                                                   |      |
| 29 |                |                      |                                                                   |      |
| 30 |                |                      |                                                                   |      |
| 31 | Statistical    | <a href="#">#12d</a> | If applicable, explain how loss to follow-up was addressed        | 6    |
| 32 | methods        |                      |                                                                   |      |
| 33 |                |                      |                                                                   |      |
| 34 |                |                      |                                                                   |      |
| 35 |                |                      |                                                                   |      |
| 36 | Statistical    | <a href="#">#12e</a> | Describe any sensitivity analyses                                 | 9-10 |
| 37 | methods        |                      |                                                                   |      |
| 38 |                |                      |                                                                   |      |
| 39 |                |                      |                                                                   |      |
| 40 |                |                      |                                                                   |      |
| 41 |                |                      |                                                                   |      |
| 42 | <b>Results</b> |                      |                                                                   |      |
| 43 |                |                      |                                                                   |      |
| 44 |                |                      |                                                                   |      |
| 45 | Participants   | <a href="#">#13a</a> | Report numbers of individuals at each stage of study—eg           | 6    |
| 46 |                |                      | numbers potentially eligible, examined for eligibility, confirmed |      |
| 47 |                |                      | eligible, included in the study, completing follow-up, and        |      |
| 48 |                |                      | analysed. Give information separately for for exposed and         |      |
| 49 |                |                      | unexposed groups if applicable.                                   |      |
| 50 |                |                      |                                                                   |      |
| 51 |                |                      |                                                                   |      |
| 52 |                |                      |                                                                   |      |
| 53 |                |                      |                                                                   |      |
| 54 |                |                      |                                                                   |      |
| 55 |                |                      |                                                                   |      |
| 56 |                |                      |                                                                   |      |
| 57 | Participants   | <a href="#">#13b</a> | Give reasons for non-participation at each stage                  | N/A  |
| 58 |                |                      |                                                                   |      |
| 59 |                |                      |                                                                   |      |
| 60 |                |                      |                                                                   |      |

|    |                   |                      |                                                                   |     |
|----|-------------------|----------------------|-------------------------------------------------------------------|-----|
| 1  | Participants      | <a href="#">#13c</a> | Consider use of a flow diagram                                    | N/A |
| 2  |                   |                      |                                                                   |     |
| 3  |                   |                      |                                                                   |     |
| 4  | Descriptive data  | <a href="#">#14a</a> | Give characteristics of study participants (eg demographic,       | 10  |
| 5  |                   |                      | clinical, social) and information on exposures and potential      |     |
| 6  |                   |                      | confounders. Give information separately for exposed and          |     |
| 7  |                   |                      | unexposed groups if applicable.                                   |     |
| 8  |                   |                      |                                                                   |     |
| 9  |                   |                      |                                                                   |     |
| 10 |                   |                      |                                                                   |     |
| 11 |                   |                      |                                                                   |     |
| 12 |                   |                      |                                                                   |     |
| 13 |                   |                      |                                                                   |     |
| 14 | Descriptive data  | <a href="#">#14b</a> | Indicate number of participants with missing data for each        | 6   |
| 15 |                   |                      | variable of interest                                              |     |
| 16 |                   |                      |                                                                   |     |
| 17 |                   |                      |                                                                   |     |
| 18 |                   |                      |                                                                   |     |
| 19 | Descriptive data  | <a href="#">#14c</a> | Summarise follow-up time (eg, average and total amount)           | 6   |
| 20 |                   |                      |                                                                   |     |
| 21 |                   |                      |                                                                   |     |
| 22 |                   |                      |                                                                   |     |
| 23 | Outcome data      | <a href="#">#15</a>  | Report numbers of outcome events or summary measures              | N/A |
| 24 |                   |                      | over time. Give information separately for exposed and            |     |
| 25 |                   |                      | unexposed groups if applicable.                                   |     |
| 26 |                   |                      |                                                                   |     |
| 27 |                   |                      |                                                                   |     |
| 28 |                   |                      |                                                                   |     |
| 29 |                   |                      |                                                                   |     |
| 30 | Main results      | <a href="#">#16a</a> | Give unadjusted estimates and, if applicable, confounder-         | 11  |
| 31 |                   |                      | adjusted estimates and their precision (eg, 95% confidence        |     |
| 32 |                   |                      | interval). Make clear which confounders were adjusted for and     |     |
| 33 |                   |                      | why they were included                                            |     |
| 34 |                   |                      |                                                                   |     |
| 35 |                   |                      |                                                                   |     |
| 36 |                   |                      |                                                                   |     |
| 37 |                   |                      |                                                                   |     |
| 38 |                   |                      |                                                                   |     |
| 39 |                   |                      |                                                                   |     |
| 40 | Main results      | <a href="#">#16b</a> | Report category boundaries when continuous variables were         | 9   |
| 41 |                   |                      | categorized                                                       |     |
| 42 |                   |                      |                                                                   |     |
| 43 |                   |                      |                                                                   |     |
| 44 |                   |                      |                                                                   |     |
| 45 | Main results      | <a href="#">#16c</a> | If relevant, consider translating estimates of relative risk into | N/A |
| 46 |                   |                      | absolute risk for a meaningful time period                        |     |
| 47 |                   |                      |                                                                   |     |
| 48 |                   |                      |                                                                   |     |
| 49 |                   |                      |                                                                   |     |
| 50 |                   |                      |                                                                   |     |
| 51 | Other analyses    | <a href="#">#17</a>  | Report other analyses done—e.g., analyses of subgroups and        | 12  |
| 52 |                   |                      | interactions, and sensitivity analyses                            |     |
| 53 |                   |                      |                                                                   |     |
| 54 |                   |                      |                                                                   |     |
| 55 |                   |                      |                                                                   |     |
| 56 | <b>Discussion</b> |                      |                                                                   |     |
| 57 |                   |                      |                                                                   |     |
| 58 |                   |                      |                                                                   |     |
| 59 |                   |                      |                                                                   |     |
| 60 |                   |                      |                                                                   |     |

|    |                          |                     |                                                                      |       |
|----|--------------------------|---------------------|----------------------------------------------------------------------|-------|
| 1  | Key results              | <a href="#">#18</a> | Summarise key results with reference to study objectives             | 12    |
| 2  |                          |                     |                                                                      |       |
| 3  |                          |                     |                                                                      |       |
| 4  | Limitations              | <a href="#">#19</a> | Discuss limitations of the study, taking into account sources of     | 16    |
| 5  |                          |                     | potential bias or imprecision. Discuss both direction and            |       |
| 6  |                          |                     | magnitude of any potential bias.                                     |       |
| 7  |                          |                     |                                                                      |       |
| 8  |                          |                     |                                                                      |       |
| 9  |                          |                     |                                                                      |       |
| 10 |                          |                     |                                                                      |       |
| 11 |                          |                     |                                                                      |       |
| 12 | Interpretation           | <a href="#">#20</a> | Give a cautious overall interpretation considering objectives,       | 12-14 |
| 13 |                          |                     | limitations, multiplicity of analyses, results from similar studies, |       |
| 14 |                          |                     | and other relevant evidence.                                         |       |
| 15 |                          |                     |                                                                      |       |
| 16 |                          |                     |                                                                      |       |
| 17 |                          |                     |                                                                      |       |
| 18 |                          |                     |                                                                      |       |
| 19 | Generalisability         | <a href="#">#21</a> | Discuss the generalisability (external validity) of the study        | 16-17 |
| 20 |                          |                     | results                                                              |       |
| 21 |                          |                     |                                                                      |       |
| 22 |                          |                     |                                                                      |       |
| 23 |                          |                     |                                                                      |       |
| 24 |                          |                     |                                                                      |       |
| 25 | <b>Other Information</b> |                     |                                                                      |       |
| 26 |                          |                     |                                                                      |       |
| 27 |                          |                     |                                                                      |       |
| 28 | Funding                  | <a href="#">#22</a> | Give the source of funding and the role of the funders for the       | 1     |
| 29 |                          |                     | present study and, if applicable, for the original study on which    |       |
| 30 |                          |                     | the present article is based                                         |       |
| 31 |                          |                     |                                                                      |       |
| 32 |                          |                     |                                                                      |       |
| 33 |                          |                     |                                                                      |       |
| 34 |                          |                     |                                                                      |       |
| 35 |                          |                     |                                                                      |       |

None The STROBE checklist is distributed under the terms of the Creative Commons Attribution License CC-BY. This checklist can be completed online using <https://www.goodreports.org/>, a tool made by the [EQUATOR Network](#) in collaboration with [Penelope.ai](#)
