# Supplementary material for: Disability discrimination and well-being in the United Kingdom: a prospective cohort study
Source: PubMed Central journal article supplement (PMC7069317; doi:10.1136/bmjopen-2019-035714), 2020-03-12
Supplement: bmjopen-2019-035714supp001.pdf [file bmjopen-2019-035714supp001.pdf]

**Supplementary table 1:** Perceived disability discrimination types and settings by type of disability

| <b>Types of discrimination</b> | <b>Physical</b> | <b>Sensory</b> | <b>Cognitive</b> | <b>Other</b> | <b>p value</b> |
|--------------------------------|-----------------|----------------|------------------|--------------|----------------|
| Felt unsafe at someplace       | 12 (85.7%)      | 9 (90%)        | 12 (92.3%)       | 60 (84.5%)   | 0.874          |
| Avoided at someplace           | 8 (53.3%)       | 6 (75%)        | 9 (75%)          | 52 (69.3%)   | 0.336          |
| Felt insulted at someplace     | 3 (25%)         | 1 (12.5%)      | 1 (10%)          | 15 (27.3%)   | 0.572          |
| Attacked at someplace          | 0 (0%)          | 0 (0%)         | 0(0%)            | 3(4.4%)      | 0.621          |
| <b>Settings</b>                |                 |                |                  |              |                |
| School/work                    | 2 (12.5%)       | 1 (9.1%)       | 0 (0%)           | 12 (15.8%)   | 0.424          |
| Public transport               | 10 (62.5%)      | 3 (27.3%)      | 6 (42.9%)        | 41 (53.9%)   | 0.266          |
| Bus or train stations          | 5 (31.3%)       | 2 (18.2%)      | 6 (42.9%)        | 34 (44.7%)   | 0.328          |
| Taxis                          | 4 (25%)         | 0 (0%)         | 1 (7.1%)         | 9 (11.8%)    | 0.223          |
| Public buildings               | 8 (50%)         | 7 (63.6%)      | 7 (50%)          | 48 (63.2%)   | 0.654          |
| On the street                  | 12 (75%)        | 8 (72.7%)      | 9 (64.3%)        | 62 (81.6%)   | 0.504          |
| At home                        | 3 (18.8%)       | 3 (27.3%)      | 4 (28.6%)        | 20 (26.3%)   | 0.920          |

Data are presented as numbers (% yes)

**Supplementary table 2:** Prospective associations between perceived disability discrimination and wellbeing outcomes (imputed analysis)

|                             | Psychological distress <sup>a</sup> | SF-12 mental <sup>b</sup> | Life satisfaction <sup>c</sup> | Fair/poor self-rated health <sup>d</sup> |
|-----------------------------|-------------------------------------|---------------------------|--------------------------------|------------------------------------------|
|                             | <i>B</i> (95% CI)                   | <i>B</i> (95% CI)         | <i>B</i> (95% CI)              | <i>B</i> (95% CI)                        |
| <b>Wave 5</b>               |                                     |                           |                                |                                          |
| No perceived discrimination | Reference<br>0.22 [-3.21; 3.64]     | Reference                 | Reference                      | 1 (Reference)<br>1.38 [0.65; 2.93]       |
| Perceived discrimination    |                                     | -4.55 [-8.75; -0.34]*     | -0.49 [-1.10; 0.12]            |                                          |

All analyses are adjusted for age, sex, household income, education, ethnicity and disability type. Prospective analyses are additionally adjusted for baseline wellbeing status/score.

<sup>a</sup>= *n* = 454 for the no perceived discrimination group; *n* = 82 for the perceived discrimination group; <sup>b</sup>= *n* = 742 for the no perceived discrimination group; *n* = 117 for the perceived discrimination group; <sup>c</sup>= *n* = 454 for the no perceived discrimination group; *n* = 84 for the perceived discrimination group; <sup>d</sup>= *n* = 754 for the no perceived discrimination group; *n* = 117 for the perceived discrimination group

\**p* < 0.05, \*\**p* < 0.01, \*\*\**p* < 0.001

CI = confidence interval, OR = odds ratio

Possible scores on the psychological distress scale range from 0-12, SF-12 mental component scale range from 0-100 and the life satisfaction scale scores range from 0-7.
